# Supplementary material for: Quantifying surface morphology of manufactured activated carbon and the waste coffee grounds using the Getis-Ord-Gi* statistic and Ripley’s K function
Source: Sci Rep. 2021 Apr 6;11:7543. doi: 10.1038/s41598-021-87249-0 (PMC8024374; doi:10.1038/s41598-021-87249-0)
Supplement: Supplementary file 5 — Supplementary Information 5. [file 41598_2021_87249_MOESM5_ESM.xlsx]

## Sheet: S4 Area between Ripley’s K and 
This sheet describes the area of a region between Ripley's K function and CSR.
Number	Descriptor	Manufactured	Value	StrongPoints
0	ME	Raw	6.4712e+06	20
1	ME	Physical	9.45163e+06	20
2	ME	ZnCl	1.01934e+07	20
3	ME	H3PO4-0.25	6.12297e+06	20
4	ME	H3PO4-0.5	3.60866e+06	20
5	ME	NaOH-1	1.20902e+07	20
6	ME	Raw	7.69367e+06	40
7	ME	Physical	7.84955e+06	40
8	ME	ZnCl	8.04498e+06	40
9	ME	H3PO4-0.25	7.02661e+06	40
10	ME	H3PO4-0.5	1.07851e+06	40
11	ME	NaOH-1	9.08977e+06	40
12	ME	Raw	6.83449e+06	60
13	ME	Physical	7.44522e+06	60
14	ME	ZnCl	8.64777e+06	60
15	ME	H3PO4-0.25	6.4183e+06	60
16	ME	H3PO4-0.5	1.93381e+06	60
17	ME	NaOH-1	1.27528e+07	60
18	ME	Raw	5.11433e+06	80
19	ME	Physical	7.74085e+06	80
20	ME	ZnCl	8.95964e+06	80
21	ME	H3PO4-0.25	5.71763e+06	80
22	ME	H3PO4-0.5	1.72332e+06	80
23	ME	NaOH-1	1.11852e+07	80
24	ME	Raw	4.66179e+06	100
25	ME	Physical	8.4375e+06	100
26	ME	ZnCl	8.32651e+06	100
27	ME	H3PO4-0.25	5.11749e+06	100
28	ME	H3PO4-0.5	2.09636e+06	100
29	ME	NaOH-1	1.0361e+07	100
30	Harris	Raw	4.97623e+06	20
31	Harris	Physical	5.7489e+06	20
32	Harris	ZnCl	2.45121e+07	20
33	Harris	H3PO4-0.25	8.63932e+06	20
34	Harris	H3PO4-0.5	4.73101e+06	20
35	Harris	NaOH-1	8.27598e+06	20
36	Harris	Raw	8.74119e+06	40
37	Harris	Physical	7.09091e+06	40
38	Harris	ZnCl	1.77577e+07	40
39	Harris	H3PO4-0.25	1.07412e+07	40
40	Harris	H3PO4-0.5	2.12878e+06	40
41	Harris	NaOH-1	1.33241e+07	40
42	Harris	Raw	8.9201e+06	60
43	Harris	Physical	7.00656e+06	60
44	Harris	ZnCl	1.07906e+07	60
45	Harris	H3PO4-0.25	6.25419e+06	60
46	Harris	H3PO4-0.5	1.69024e+06	60
47	Harris	NaOH-1	1.21541e+07	60
48	Harris	Raw	8.28373e+06	80
49	Harris	Physical	6.94353e+06	80
50	Harris	ZnCl	1.0789e+07	80
51	Harris	H3PO4-0.25	5.4097e+06	80
52	Harris	H3PO4-0.5	1.75604e+06	80
53	Harris	NaOH-1	1.01841e+07	80
54	Harris	Raw	7.55731e+06	100
55	Harris	Physical	6.79613e+06	100
56	Harris	ZnCl	1.10332e+07	100
57	Harris	H3PO4-0.25	4.68144e+06	100
58	Harris	H3PO4-0.5	1.92487e+06	100
59	Harris	NaOH-1	1.02432e+07	100
60	BRISK	Physical	1.48925e+07	20
61	BRISK	ZnCl	1.53026e+07	20
62	BRISK	H3PO4-0.25	7.61196e+06	20
63	BRISK	H3PO4-0.5	6.96228e+06	20
64	BRISK	NaOH-1	1.39484e+07	20
65	BRISK	Physical	1.48925e+07	40
66	BRISK	ZnCl	1.52267e+07	40
67	BRISK	H3PO4-0.25	7.61196e+06	40
68	BRISK	H3PO4-0.5	5.09984e+06	40
69	BRISK	NaOH-1	1.00371e+07	40
70	BRISK	Physical	1.48925e+07	60
71	BRISK	ZnCl	1.58574e+07	60
72	BRISK	H3PO4-0.25	7.61196e+06	60
73	BRISK	H3PO4-0.5	4.66062e+06	60
74	BRISK	NaOH-1	9.08351e+06	60
75	BRISK	Physical	1.48925e+07	80
76	BRISK	ZnCl	1.36194e+07	80
77	BRISK	H3PO4-0.25	7.61196e+06	80
78	BRISK	H3PO4-0.5	5.8387e+06	80
79	BRISK	NaOH-1	9.67968e+06	80
80	BRISK	Physical	1.48925e+07	100
81	BRISK	ZnCl	1.15953e+07	100
82	BRISK	H3PO4-0.25	7.61196e+06	100
83	BRISK	H3PO4-0.5	4.61292e+06	100
84	BRISK	NaOH-1	9.67968e+06	100
85	ORB	Raw	3.61453e+07	20
86	ORB	Physical	5.80558e+07	20
87	ORB	ZnCl	2.79364e+07	20
88	ORB	H3PO4-0.25	2.01377e+07	20
90	ORB	NaOH-1	4.27539e+07	20
92	ORB	Physical	2.77546e+07	40
93	ORB	ZnCl	2.21277e+07	40
94	ORB	H3PO4-0.25	1.79764e+07	40
115	SURF	Raw	3.42516e+07	20
116	SURF	Physical	1.0914e+07	20
117	SURF	ZnCl	1.07858e+07	20
118	SURF	H3PO3-0.25	4.24184e+06	20
119	SURF	H3PO4-0.5	6.31035e+06	20
120	SURF	NaOH-1	1.34824e+07	20
121	SURF	Raw	3.42516e+07	40
122	SURF	Physical	7.58506e+06	40
123	SURF	ZnCl	8.12875e+06	40
124	SURF	H3PO3-0.25	3.14387e+06	40
125	SURF	H3PO4-0.5	4.38073e+06	40
126	SURF	NaOH-1	1.2951e+07	40
127	SURF	Raw	3.42516e+07	60
128	SURF	Physical	7.07937e+06	60
129	SURF	ZnCl	6.45715e+06	60
130	SURF	H3PO3-0.25	2.32389e+06	60
131	SURF	H3PO4-0.5	4.98996e+06	60
132	SURF	NaOH-1	1.14604e+07	60
133	SURF	Raw	3.42516e+07	80
134	SURF	Physical	7.07937e+06	80
135	SURF	ZnCl	5.23741e+06	80
136	SURF	H3PO3-0.25	2.05584e+06	80
137	SURF	H3PO4-0.5	5.09298e+06	80
138	SURF	NaOH-1	1.0115e+07	80
139	SURF	Raw	3.42516e+07	100
140	SURF	Physical	7.07937e+06	100
141	SURF	ZnCl	4.88658e+06	100
142	SURF	H3PO3-0.25	2.42602e+06	100
143	SURF	H3PO4-0.5	4.84838e+06	100
144	SURF	NaOH-1	9.48323e+06	100
145	KAZE	Raw	3.99143e+06	20
146	KAZE	Physical	1.18134e+07	20
147	KAZE	ZnCl	9.85203e+06	20
148	KAZE	H3PO3-0.25	8.35112e+06	20
149	KAZE	H3PO4-0.5	3.43125e+06	20
150	KAZE	NaOH-1	1.90998e+07	20
151	KAZE	Raw	4.6588e+06	40
152	KAZE	Physical	8.83792e+06	40
153	KAZE	ZnCl	9.70667e+06	40
154	KAZE	H3PO3-0.25	6.92421e+06	40
155	KAZE	H3PO4-0.5	2.73474e+06	40
156	KAZE	NaOH-1	1.05982e+07	40
157	KAZE	Raw	4.22612e+06	60
158	KAZE	Physical	7.50531e+06	60
159	KAZE	ZnCl	7.7608e+06	60
160	KAZE	H3PO3-0.25	4.15447e+06	60
161	KAZE	H3PO4-0.5	2.48418e+06	60
162	KAZE	NaOH-1	1.16596e+07	60
163	KAZE	Raw	4.44806e+06	80
164	KAZE	Physical	6.54391e+06	80
165	KAZE	ZnCl	6.95389e+06	80
166	KAZE	H3PO3-0.25	3.78383e+06	80
167	KAZE	H3PO4-0.5	3.13093e+06	80
168	KAZE	NaOH-1	1.25631e+07	80
169	KAZE	Raw	4.07681e+06	100
170	KAZE	Physical	5.79656e+06	100
171	KAZE	ZnCl	6.55623e+06	100
172	KAZE	H3PO3-0.25	3.51325e+06	100
173	KAZE	H3PO4-0.5	3.24961e+06	100
174	KAZE	NaOH-1	1.04819e+07	100
