# Supplementary material for: Quantifying surface morphology of manufactured activated carbon and the waste coffee grounds using the Getis-Ord-Gi* statistic and Ripley’s K function
Source: Sci Rep. 2021 Apr 6;11:7543. doi: 10.1038/s41598-021-87249-0 (PMC8024374; doi:10.1038/s41598-021-87249-0)
Supplement: Supplementary file 6 — Supplementary Information 6. [file 41598_2021_87249_MOESM6_ESM.xlsx]

## Sheet: S5 Area between Ripley’s K and 
This sheet describes the area of a region between Ripley's K function and CSR (Augmented).
Number	Descriptor	Manufactured	Value	StrongPoints
0	ME	Raw	3.38389e+06	20
1	ME	Physical	1.92903e+07	20
2	ME	ZnCl	1.39114e+07	20
3	ME	H3PO4-0.25	1.48638e+06	20
4	ME	H3PO4-0.5	5.21139e+06	20
5	ME	NaOH-1	2.88532e+06	20
6	ME	Raw	5.61686e+06	40
7	ME	Physical	4.00678e+06	40
8	ME	ZnCl	9.72254e+06	40
9	ME	H3PO4-0.25	1.17176e+07	40
10	ME	H3PO4-0.5	4.20396e+06	40
11	ME	NaOH-1	1.0551e+07	40
12	ME	Raw	2.01556e+07	60
13	ME	Physical	7.68771e+06	60
14	ME	ZnCl	1.07454e+07	60
15	ME	H3PO4-0.25	7.43377e+06	60
16	ME	H3PO4-0.5	4.10688e+06	60
17	ME	NaOH-1	1.5445e+07	60
18	ME	Raw	4.12233e+07	80
19	ME	Physical	2.52893e+07	80
20	ME	ZnCl	1.18347e+07	80
21	ME	H3PO4-0.25	7.8262e+06	80
22	ME	H3PO4-0.5	2.79316e+06	80
23	ME	NaOH-1	7.55124e+06	80
24	ME	Raw	3.82188e+06	100
25	ME	Physical	2.2888e+07	100
26	ME	ZnCl	8.15542e+06	100
27	ME	H3PO4-0.25	2.9743e+06	100
28	ME	H3PO4-0.5	3.17191e+06	100
29	ME	NaOH-1	9.86493e+06	100
30	Harris	Raw	2.24767e+06	20
31	Harris	Physical	1.37635e+07	20
32	Harris	ZnCl	1.778e+07	20
33	Harris	H3PO4-0.25	5.19894e+06	20
34	Harris	H3PO4-0.5	8.6278e+06	20
35	Harris	NaOH-1	6.7836e+06	20
36	Harris	Raw	4.40996e+06	40
37	Harris	Physical	5.48726e+06	40
38	Harris	ZnCl	1.20478e+07	40
39	Harris	H3PO4-0.25	9.3587e+06	40
40	Harris	H3PO4-0.5	6.24665e+06	40
41	Harris	NaOH-1	1.2682e+07	40
42	Harris	Raw	4.84784e+06	60
43	Harris	Physical	6.01985e+06	60
44	Harris	ZnCl	1.38006e+07	60
45	Harris	H3PO4-0.25	6.64629e+06	60
46	Harris	H3PO4-0.5	3.34696e+06	60
47	Harris	NaOH-1	1.30551e+07	60
48	Harris	Raw	7.73218e+06	80
49	Harris	Physical	6.2181e+06	80
50	Harris	ZnCl	1.47417e+07	80
51	Harris	H3PO4-0.25	6.62246e+06	80
52	Harris	H3PO4-0.5	4.09047e+06	80
53	Harris	NaOH-1	5.95724e+06	80
54	Harris	Raw	3.82992e+06	100
55	Harris	Physical	4.03399e+06	100
56	Harris	ZnCl	1.1005e+07	100
57	Harris	H3PO4-0.25	3.13353e+06	100
58	Harris	H3PO4-0.5	4.19707e+06	100
59	Harris	NaOH-1	1.13881e+07	100
60	BRISK	Physical	3.33132e+07	20
61	BRISK	ZnCl	1.4077e+07	20
62	BRISK	H3PO4-0.25	1.72893e+06	20
63	BRISK	H3PO4-0.5	1.24962e+07	20
64	BRISK	NaOH-1	6.68198e+06	20
66	BRISK	Physical	2.78171e+07	40
68	BRISK	H3PO4-0.25	8.92256e+06	40
69	BRISK	H3PO4-0.5	9.50811e+06	40
70	BRISK	NaOH-1	8.10647e+06	40
71	BRISK	Physical	3.65156e+07	60
72	BRISK	ZnCl	2.30177e+07	60
73	BRISK	H3PO4-0.25	1.23721e+07	60
74	BRISK	H3PO4-0.5	6.52416e+06	60
75	BRISK	NaOH-1	1.79286e+07	60
76	BRISK	Raw	-6.47987e+06	80
77	BRISK	Physical	3.50866e+07	80
78	BRISK	ZnCl	1.78503e+07	80
79	BRISK	H3PO4-0.25	7.55419e+06	80
80	BRISK	H3PO4-0.5	7.14963e+06	80
81	BRISK	NaOH-1	1.65677e+07	80
83	BRISK	Physical	2.43654e+07	100
84	BRISK	ZnCl	1.23428e+07	100
85	BRISK	H3PO4-0.25	7.70747e+06	100
86	BRISK	H3PO4-0.5	4.37821e+06	100
87	BRISK	NaOH-1	6.979e+06	100
88	ORB	Raw	4.07466e+07	20
89	ORB	Physical	1.83743e+07	20
90	ORB	ZnCl	3.07302e+07	20
91	ORB	H3PO4-0.25	2.09508e+07	20
92	ORB	H3PO4-0.5	2.54964e+07	20
93	ORB	NaOH-1	2.54196e+07	20
95	ORB	Physical	1.60003e+07	40
98	ORB	H3PO4-0.5	1.96201e+07	40
99	ORB	NaOH-1	1.94602e+07	40
100	ORB	Raw	7.56194e+06	60
101	ORB	Physical	2.35218e+07	60
103	ORB	H3PO4-0.25	1.11249e+07	60
104	ORB	H3PO4-0.5	2.19905e+07	60
105	ORB	NaOH-1	3.18613e+07	60
107	ORB	Physical	1.37074e+07	80
112	ORB	Raw	8.75591e+06	100
113	ORB	Physical	1.14906e+07	100
114	ORB	ZnCl	1.85891e+07	100
115	ORB	H3PO4-0.25	1.07126e+07	100
117	ORB	NaOH-1	1.86469e+07	100
118	SURF	Raw	2.74321e+07	20
119	SURF	Physical	9.96259e+06	20
120	SURF	ZnCl	1.06896e+07	20
121	SURF	H3PO4-0.25	1.54045e+06	20
122	SURF	H3PO4-0.5	1.31421e+07	20
123	SURF	NaOH-1	3.92668e+06	20
124	SURF	Raw	5.49709e+06	40
125	SURF	Physical	6.72265e+06	40
126	SURF	ZnCl	9.39835e+06	40
127	SURF	H3PO4-0.25	1.82074e+06	40
128	SURF	H3PO4-0.5	8.52373e+06	40
129	SURF	NaOH-1	6.34152e+06	40
130	SURF	Raw	8.47323e+06	60
131	SURF	Physical	7.92042e+06	60
132	SURF	ZnCl	8.38615e+06	60
133	SURF	H3PO4-0.25	2.69297e+06	60
134	SURF	H3PO4-0.5	4.26953e+06	60
135	SURF	NaOH-1	1.79896e+07	60
136	SURF	Raw	1.65384e+07	80
137	SURF	Physical	5.27454e+06	80
138	SURF	ZnCl	6.93728e+06	80
139	SURF	H3PO4-0.25	2.2292e+06	80
140	SURF	H3PO4-0.5	4.91893e+06	80
141	SURF	NaOH-1	6.65797e+06	80
142	SURF	Raw	1.36275e+07	100
143	SURF	Physical	4.78774e+06	100
144	SURF	ZnCl	5.43013e+06	100
145	SURF	H3PO4-0.25	1.538e+06	100
146	SURF	H3PO4-0.5	3.52474e+06	100
147	SURF	NaOH-1	9.56105e+06	100
148	KAZE	Raw	4.13728e+06	20
149	KAZE	Physical	9.01876e+06	20
150	KAZE	ZnCl	1.26323e+07	20
151	KAZE	H3PO4-0.25	4.55447e+06	20
152	KAZE	H3PO4-0.5	6.05626e+06	20
153	KAZE	NaOH-1	1.3257e+07	20
154	KAZE	Raw	2.23672e+06	40
155	KAZE	Physical	5.16483e+06	40
156	KAZE	ZnCl	7.44714e+06	40
157	KAZE	H3PO4-0.25	2.89862e+06	40
158	KAZE	H3PO4-0.5	4.4356e+06	40
159	KAZE	NaOH-1	1.1681e+07	40
160	KAZE	Raw	2.26483e+06	60
161	KAZE	Physical	6.31003e+06	60
162	KAZE	ZnCl	1.28069e+07	60
163	KAZE	H3PO4-0.25	3.19574e+06	60
164	KAZE	H3PO4-0.5	4.05109e+06	60
165	KAZE	NaOH-1	1.18913e+07	60
166	KAZE	Raw	5.32226e+06	80
167	KAZE	Physical	5.68246e+06	80
168	KAZE	ZnCl	8.55541e+06	80
170	KAZE	H3PO4-0.5	3.46054e+06	80
171	KAZE	NaOH-1	4.76801e+06	80
172	KAZE	Raw	3.39431e+06	100
173	KAZE	Physical	4.63333e+06	100
174	KAZE	ZnCl	5.82056e+06	100
175	KAZE	H3PO4-0.25	2.09996e+06	100
176	KAZE	H3PO4-0.5	3.63412e+06	100
177	KAZE	NaOH-1	9.79984e+06	100
178	ME	Raw	4.59876e+07	20
179	ME	Physical	4.46994e+06	20
180	ME	ZnCl	1.07125e+07	20
181	ME	H3PO4-0.25	2.2105e+06	20
182	ME	H3PO4-0.5	6.6941e+06	20
183	ME	NaOH-1	7.76843e+06	20
184	ME	Raw	4.48751e+07	40
185	ME	Physical	1.08562e+07	40
186	ME	ZnCl	1.07005e+07	40
187	ME	H3PO4-0.25	7.00319e+06	40
188	ME	H3PO4-0.5	1.11104e+07	40
189	ME	NaOH-1	2.24828e+06	40
190	ME	Raw	7.05684e+06	60
191	ME	Physical	2.41507e+07	60
192	ME	ZnCl	1.03122e+07	60
193	ME	H3PO4-0.25	9.18886e+06	60
194	ME	H3PO4-0.5	2.04591e+07	60
195	ME	NaOH-1	1.19616e+07	60
196	ME	Raw	3.21689e+07	80
197	ME	Physical	1.76439e+07	80
198	ME	ZnCl	9.88913e+06	80
199	ME	H3PO4-0.25	5.45432e+06	80
200	ME	H3PO4-0.5	1.06639e+07	80
201	ME	NaOH-1	1.07002e+07	80
202	ME	Raw	3.0547e+06	100
203	ME	Physical	6.71586e+06	100
204	ME	ZnCl	9.0468e+06	100
205	ME	H3PO4-0.25	1.34061e+07	100
206	ME	H3PO4-0.5	3.76642e+06	100
207	ME	NaOH-1	1.47308e+07	100
208	Harris	Raw	1.5457e+07	20
209	Harris	Physical	882061	20
210	Harris	ZnCl	1.72027e+07	20
211	Harris	H3PO4-0.25	6.66944e+06	20
212	Harris	H3PO4-0.5	9.98377e+06	20
213	Harris	NaOH-1	1.29105e+07	20
214	Harris	Raw	1.65233e+07	40
215	Harris	Physical	5.82714e+06	40
216	Harris	ZnCl	1.82858e+07	40
217	Harris	H3PO4-0.25	1.0497e+07	40
218	Harris	H3PO4-0.5	7.96849e+06	40
219	Harris	NaOH-1	4.4683e+06	40
220	Harris	Raw	4.98234e+06	60
221	Harris	Physical	4.03146e+06	60
222	Harris	ZnCl	1.41541e+07	60
223	Harris	H3PO4-0.25	1.03796e+07	60
224	Harris	H3PO4-0.5	7.11674e+06	60
225	Harris	NaOH-1	9.53308e+06	60
226	Harris	Raw	7.93796e+06	80
227	Harris	Physical	6.67709e+06	80
228	Harris	ZnCl	1.2492e+07	80
229	Harris	H3PO4-0.25	5.94787e+06	80
230	Harris	H3PO4-0.5	4.73541e+06	80
231	Harris	NaOH-1	1.06856e+07	80
232	Harris	Raw	6.41358e+06	100
233	Harris	Physical	6.32276e+06	100
234	Harris	ZnCl	1.12809e+07	100
235	Harris	H3PO4-0.25	7.21623e+06	100
236	Harris	H3PO4-0.5	4.51803e+06	100
237	Harris	NaOH-1	1.66779e+07	100
238	BRISK	Physical	2.38992e+07	20
239	BRISK	ZnCl	3.78484e+07	20
240	BRISK	H3PO4-0.25	4.5825e+06	20
241	BRISK	H3PO4-0.5	1.45477e+07	20
242	BRISK	NaOH-1	7.89201e+06	20
243	BRISK	Raw	-6.47987e+06	40
244	BRISK	Physical	4.17117e+07	40
245	BRISK	ZnCl	2.75554e+07	40
246	BRISK	H3PO4-0.25	5.75231e+06	40
247	BRISK	H3PO4-0.5	1.68025e+07	40
248	BRISK	NaOH-1	7.86751e+06	40
249	BRISK	Physical	1.99455e+07	60
250	BRISK	ZnCl	1.30302e+07	60
251	BRISK	H3PO4-0.25	1.03519e+07	60
252	BRISK	H3PO4-0.5	9.03975e+06	60
253	BRISK	NaOH-1	1.02948e+07	60
254	BRISK	Physical	2.59478e+07	80
255	BRISK	ZnCl	1.54983e+07	80
256	BRISK	H3PO4-0.25	9.10963e+06	80
257	BRISK	H3PO4-0.5	8.6903e+06	80
258	BRISK	NaOH-1	1.18085e+07	80
259	BRISK	Physical	3.75371e+07	100
260	BRISK	ZnCl	9.57667e+06	100
261	BRISK	H3PO4-0.25	7.63494e+06	100
262	BRISK	H3PO4-0.5	4.59322e+06	100
263	BRISK	NaOH-1	1.77231e+07	100
264	ORB	Raw	1.17461e+07	20
265	ORB	Physical	2.27057e+07	20
266	ORB	ZnCl	2.65334e+07	20
268	ORB	H3PO4-0.5	2.98927e+07	20
270	ORB	Raw	1.10627e+07	40
271	ORB	Physical	2.80447e+07	40
272	ORB	ZnCl	2.2187e+07	40
273	ORB	H3PO4-0.25	1.53463e+07	40
274	ORB	H3PO4-0.5	2.02299e+07	40
275	ORB	NaOH-1	3.30304e+07	40
278	ORB	ZnCl	2.37038e+07	60
280	ORB	H3PO4-0.5	1.68205e+07	60
282	ORB	Raw	7.38526e+06	80
283	ORB	Physical	1.49315e+07	80
284	ORB	ZnCl	2.21308e+07	80
285	ORB	H3PO4-0.25	7.97925e+06	80
286	ORB	H3PO4-0.5	1.74319e+07	80
288	ORB	Raw	7.55237e+06	100
289	ORB	Physical	1.27389e+07	100
290	ORB	ZnCl	1.94275e+07	100
291	ORB	H3PO4-0.25	7.36265e+06	100
294	SURF	Raw	1.89577e+07	20
295	SURF	Physical	9.04906e+06	20
296	SURF	ZnCl	1.13544e+07	20
297	SURF	H3PO4-0.25	2.33078e+06	20
298	SURF	H3PO4-0.5	1.13024e+07	20
299	SURF	NaOH-1	1.7655e+07	20
300	SURF	Raw	1.04761e+07	40
301	SURF	Physical	6.64035e+06	40
302	SURF	ZnCl	9.54461e+06	40
303	SURF	H3PO4-0.25	1.92052e+06	40
304	SURF	H3PO4-0.5	4.36337e+06	40
305	SURF	NaOH-1	4.12765e+06	40
306	SURF	Raw	9.45752e+06	60
307	SURF	Physical	8.74158e+06	60
308	SURF	ZnCl	7.48175e+06	60
309	SURF	H3PO4-0.25	3.33069e+06	60
310	SURF	H3PO4-0.5	3.10601e+06	60
311	SURF	NaOH-1	1.08398e+07	60
312	SURF	Raw	1.08656e+07	80
313	SURF	Physical	8.47093e+06	80
314	SURF	ZnCl	8.80334e+06	80
315	SURF	H3PO4-0.25	2.88703e+06	80
316	SURF	H3PO4-0.5	6.16307e+06	80
317	SURF	NaOH-1	9.59296e+06	80
318	SURF	Raw	1.17258e+07	100
319	SURF	Physical	7.48687e+06	100
320	SURF	ZnCl	6.37685e+06	100
321	SURF	H3PO4-0.25	1.60324e+06	100
322	SURF	H3PO4-0.5	3.88075e+06	100
323	SURF	NaOH-1	1.18593e+07	100
324	KAZE	Raw	1.20156e+07	20
325	KAZE	Physical	7.44517e+06	20
326	KAZE	ZnCl	1.06638e+07	20
327	KAZE	H3PO4-0.25	3.48076e+06	20
328	KAZE	H3PO4-0.5	6.22589e+06	20
329	KAZE	NaOH-1	1.30631e+07	20
330	KAZE	Raw	5.66258e+06	40
331	KAZE	Physical	6.90403e+06	40
332	KAZE	ZnCl	1.30986e+07	40
333	KAZE	H3PO4-0.25	3.7711e+06	40
334	KAZE	H3PO4-0.5	5.88157e+06	40
335	KAZE	NaOH-1	7.03653e+06	40
336	KAZE	Raw	1.28553e+06	60
337	KAZE	Physical	6.95755e+06	60
338	KAZE	ZnCl	7.14016e+06	60
339	KAZE	H3PO4-0.25	3.58465e+06	60
340	KAZE	H3PO4-0.5	5.38115e+06	60
341	KAZE	NaOH-1	8.5923e+06	60
342	KAZE	Raw	4.41573e+06	80
343	KAZE	Physical	7.59606e+06	80
344	KAZE	ZnCl	1.13271e+07	80
345	KAZE	H3PO4-0.25	3.00216e+06	80
346	KAZE	H3PO4-0.5	4.73388e+06	80
347	KAZE	NaOH-1	1.01965e+07	80
348	KAZE	Raw	2.9481e+06	100
349	KAZE	Physical	4.22229e+06	100
350	KAZE	ZnCl	6.05322e+06	100
351	KAZE	H3PO4-0.25	2.65266e+06	100
352	KAZE	H3PO4-0.5	3.82336e+06	100
353	KAZE	NaOH-1	1.05748e+07	100
354	ME	Raw	3.99458e+06	20
355	ME	Physical	2.5917e+07	20
356	ME	ZnCl	1.13374e+07	20
357	ME	H3PO4-0.25	2.53421e+06	20
358	ME	H3PO4-0.5	8.60871e+06	20
359	ME	NaOH-1	3.8253e+06	20
360	ME	Raw	8.28636e+06	40
361	ME	Physical	3.83687e+06	40
362	ME	ZnCl	7.42019e+06	40
363	ME	H3PO4-0.25	5.81802e+06	40
364	ME	H3PO4-0.5	1.07188e+07	40
365	ME	NaOH-1	1.47285e+07	40
366	ME	Raw	2.55975e+07	60
367	ME	Physical	6.69412e+06	60
368	ME	ZnCl	6.92406e+06	60
369	ME	H3PO4-0.25	3.53933e+06	60
370	ME	H3PO4-0.5	2.28799e+06	60
371	ME	NaOH-1	8.00948e+06	60
372	ME	Raw	1.87061e+07	80
373	ME	Physical	7.58527e+06	80
374	ME	ZnCl	9.63899e+06	80
375	ME	H3PO4-0.25	9.02536e+06	80
376	ME	H3PO4-0.5	2.96101e+06	80
377	ME	NaOH-1	7.53405e+06	80
378	ME	Raw	3.70945e+06	100
379	ME	Physical	1.07621e+07	100
380	ME	ZnCl	7.63597e+06	100
381	ME	H3PO4-0.25	8.16702e+06	100
382	ME	H3PO4-0.5	3.97101e+06	100
383	ME	NaOH-1	9.89082e+06	100
384	Harris	Raw	2.40079e+06	20
385	Harris	Physical	1.37557e+07	20
386	Harris	ZnCl	1.58456e+07	20
387	Harris	H3PO4-0.25	5.48772e+06	20
388	Harris	H3PO4-0.5	5.53162e+06	20
389	Harris	NaOH-1	1.38397e+07	20
390	Harris	Raw	7.65282e+06	40
391	Harris	Physical	3.33233e+06	40
392	Harris	ZnCl	9.67591e+06	40
393	Harris	H3PO4-0.25	6.70932e+06	40
394	Harris	H3PO4-0.5	6.36431e+06	40
395	Harris	NaOH-1	1.7681e+07	40
396	Harris	Raw	4.36388e+06	60
397	Harris	Physical	4.87378e+06	60
398	Harris	ZnCl	1.17778e+07	60
399	Harris	H3PO4-0.25	3.89082e+06	60
400	Harris	H3PO4-0.5	3.1845e+06	60
401	Harris	NaOH-1	9.31684e+06	60
402	Harris	Raw	5.37531e+06	80
403	Harris	Physical	5.28983e+06	80
404	Harris	ZnCl	1.36885e+07	80
405	Harris	H3PO4-0.25	8.82138e+06	80
406	Harris	H3PO4-0.5	3.4609e+06	80
407	Harris	NaOH-1	8.15213e+06	80
408	Harris	Raw	4.2774e+06	100
409	Harris	Physical	6.48638e+06	100
410	Harris	ZnCl	1.13602e+07	100
411	Harris	H3PO4-0.25	5.63311e+06	100
412	Harris	H3PO4-0.5	4.07748e+06	100
413	Harris	NaOH-1	8.6541e+06	100
415	BRISK	Physical	2.51205e+07	20
416	BRISK	ZnCl	2.02949e+07	20
417	BRISK	H3PO4-0.25	9.98523e+06	20
418	BRISK	H3PO4-0.5	2.26412e+07	20
419	BRISK	NaOH-1	1.64448e+07	20
420	BRISK	Physical	2.46536e+07	40
421	BRISK	ZnCl	1.47436e+07	40
422	BRISK	H3PO4-0.25	7.99213e+06	40
423	BRISK	H3PO4-0.5	9.95389e+06	40
424	BRISK	NaOH-1	1.69124e+07	40
426	BRISK	Physical	2.95332e+07	60
427	BRISK	ZnCl	1.31909e+07	60
428	BRISK	H3PO4-0.25	6.91694e+06	60
429	BRISK	H3PO4-0.5	5.13495e+06	60
430	BRISK	NaOH-1	1.6341e+07	60
432	BRISK	Physical	3.74263e+07	80
433	BRISK	ZnCl	1.15175e+07	80
434	BRISK	H3PO4-0.25	8.58117e+06	80
435	BRISK	H3PO4-0.5	5.8559e+06	80
436	BRISK	NaOH-1	7.83448e+06	80
437	BRISK	Raw	-6.47987e+06	100
438	BRISK	Physical	2.57401e+07	100
439	BRISK	ZnCl	1.31992e+07	100
440	BRISK	H3PO4-0.25	6.86979e+06	100
441	BRISK	H3PO4-0.5	6.2801e+06	100
443	ORB	Raw	2.08498e+07	20
444	ORB	Physical	5.90562e+07	20
445	ORB	ZnCl	3.00163e+07	20
446	ORB	H3PO4-0.25	3.03822e+07	20
447	ORB	H3PO4-0.5	2.05603e+07	20
449	ORB	Raw	1.24693e+07	40
450	ORB	Physical	1.43239e+07	40
452	ORB	H3PO4-0.25	1.61642e+07	40
453	ORB	H3PO4-0.5	1.96399e+07	40
454	ORB	NaOH-1	4.6244e+07	40
455	ORB	Raw	5.81287e+06	60
456	ORB	Physical	2.28492e+07	60
457	ORB	ZnCl	2.11593e+07	60
459	ORB	H3PO4-0.5	1.88279e+07	60
473	SURF	Raw	2.56513e+06	20
474	SURF	Physical	8.66114e+06	20
475	SURF	ZnCl	3.20347e+06	20
476	SURF	H3PO4-0.25	1.7812e+06	20
477	SURF	H3PO4-0.5	9.98338e+06	20
478	SURF	NaOH-1	1.45764e+07	20
479	SURF	Raw	2.74321e+07	40
480	SURF	Physical	6.66156e+06	40
481	SURF	ZnCl	7.87545e+06	40
482	SURF	H3PO4-0.25	1.88244e+06	40
483	SURF	H3PO4-0.5	5.67148e+06	40
484	SURF	NaOH-1	1.88092e+07	40
485	SURF	Raw	8.45457e+06	60
486	SURF	Physical	5.94567e+06	60
487	SURF	ZnCl	5.64005e+06	60
488	SURF	H3PO4-0.25	2.09061e+06	60
489	SURF	H3PO4-0.5	4.47442e+06	60
490	SURF	NaOH-1	1.09e+07	60
491	SURF	Raw	1.34426e+07	80
492	SURF	Physical	5.96762e+06	80
493	SURF	ZnCl	4.82893e+06	80
494	SURF	H3PO4-0.25	3.43788e+06	80
495	SURF	H3PO4-0.5	3.01511e+06	80
496	SURF	NaOH-1	7.75538e+06	80
497	SURF	Raw	7.9872e+06	100
498	SURF	Physical	5.86533e+06	100
499	SURF	ZnCl	5.48222e+06	100
500	SURF	H3PO4-0.25	1.20658e+06	100
501	SURF	H3PO4-0.5	4.56595e+06	100
502	SURF	NaOH-1	9.07741e+06	100
503	KAZE	Raw	2.78536e+06	20
504	KAZE	Physical	1.02611e+07	20
505	KAZE	ZnCl	7.32453e+06	20
506	KAZE	H3PO4-0.25	4.5042e+06	20
507	KAZE	H3PO4-0.5	1.22347e+07	20
508	KAZE	NaOH-1	1.1685e+07	20
509	KAZE	Raw	4.50933e+06	40
510	KAZE	Physical	3.80297e+06	40
511	KAZE	ZnCl	6.54441e+06	40
512	KAZE	H3PO4-0.25	3.4307e+06	40
513	KAZE	H3PO4-0.5	4.88236e+06	40
514	KAZE	NaOH-1	1.32862e+07	40
515	KAZE	Raw	1.08273e+06	60
516	KAZE	Physical	6.09146e+06	60
517	KAZE	ZnCl	7.37025e+06	60
518	KAZE	H3PO4-0.25	4.4439e+06	60
519	KAZE	H3PO4-0.5	2.92783e+06	60
520	KAZE	NaOH-1	7.3759e+06	60
521	KAZE	Raw	4.03674e+06	80
522	KAZE	Physical	6.86878e+06	80
523	KAZE	ZnCl	5.83602e+06	80
524	KAZE	H3PO4-0.25	3.24098e+06	80
525	KAZE	H3PO4-0.5	4.19149e+06	80
526	KAZE	NaOH-1	6.29145e+06	80
527	KAZE	Raw	4.18029e+06	100
528	KAZE	Physical	4.69921e+06	100
529	KAZE	ZnCl	7.40085e+06	100
530	KAZE	H3PO4-0.25	2.58373e+06	100
531	KAZE	H3PO4-0.5	4.73729e+06	100
532	KAZE	NaOH-1	7.80471e+06	100
533	ME	Raw	4.38338e+07	20
534	ME	Physical	2.27242e+07	20
535	ME	ZnCl	1.74265e+07	20
536	ME	H3PO4-0.25	3.40341e+06	20
537	ME	H3PO4-0.5	5.31656e+06	20
538	ME	NaOH-1	1.27891e+07	20
539	ME	Raw	5.61265e+06	40
540	ME	Physical	1.49546e+07	40
541	ME	ZnCl	1.35901e+07	40
542	ME	H3PO4-0.25	7.59596e+06	40
543	ME	H3PO4-0.5	1.2665e+07	40
544	ME	NaOH-1	1.36976e+07	40
545	ME	Raw	2.94364e+07	60
546	ME	Physical	4.42462e+06	60
547	ME	ZnCl	9.0166e+06	60
548	ME	H3PO4-0.25	9.22732e+06	60
549	ME	H3PO4-0.5	3.26534e+06	60
550	ME	NaOH-1	4.30047e+06	60
551	ME	Raw	1.83624e+07	80
552	ME	Physical	6.43435e+06	80
553	ME	ZnCl	1.16338e+07	80
554	ME	H3PO4-0.25	6.6345e+06	80
555	ME	H3PO4-0.5	2.36074e+06	80
556	ME	NaOH-1	1.18113e+07	80
557	ME	Raw	4.6812e+06	100
558	ME	Physical	9.43652e+06	100
559	ME	ZnCl	9.10008e+06	100
560	ME	H3PO4-0.25	9.38598e+06	100
561	ME	H3PO4-0.5	5.7956e+06	100
562	ME	NaOH-1	5.30247e+06	100
563	Harris	Raw	3.31205e+07	20
564	Harris	Physical	1.60254e+07	20
565	Harris	ZnCl	1.62796e+07	20
566	Harris	H3PO4-0.25	9.35784e+06	20
567	Harris	H3PO4-0.5	3.93289e+06	20
568	Harris	NaOH-1	1.28529e+07	20
569	Harris	Raw	4.59156e+06	40
570	Harris	Physical	4.90476e+06	40
571	Harris	ZnCl	1.67129e+07	40
572	Harris	H3PO4-0.25	1.0177e+07	40
573	Harris	H3PO4-0.5	1.09393e+07	40
574	Harris	NaOH-1	1.35172e+07	40
575	Harris	Raw	8.60375e+06	60
576	Harris	Physical	3.94965e+06	60
577	Harris	ZnCl	1.23317e+07	60
578	Harris	H3PO4-0.25	7.29801e+06	60
579	Harris	H3PO4-0.5	5.06838e+06	60
580	Harris	NaOH-1	4.64431e+06	60
581	Harris	Raw	6.73678e+06	80
582	Harris	Physical	6.73984e+06	80
583	Harris	ZnCl	1.35768e+07	80
584	Harris	H3PO4-0.25	6.73261e+06	80
585	Harris	H3PO4-0.5	2.22608e+06	80
586	Harris	NaOH-1	1.3405e+07	80
587	Harris	Raw	6.33935e+06	100
588	Harris	Physical	5.00385e+06	100
589	Harris	ZnCl	1.22937e+07	100
590	Harris	H3PO4-0.25	4.96e+06	100
591	Harris	H3PO4-0.5	4.09675e+06	100
592	Harris	NaOH-1	5.76985e+06	100
594	BRISK	Physical	3.54121e+07	20
595	BRISK	ZnCl	2.01672e+07	20
596	BRISK	H3PO4-0.25	4.37236e+06	20
597	BRISK	H3PO4-0.5	1.08429e+07	20
598	BRISK	NaOH-1	1.69381e+07	20
600	BRISK	Physical	2.39851e+07	40
601	BRISK	ZnCl	2.46432e+07	40
602	BRISK	H3PO4-0.25	6.23952e+06	40
603	BRISK	H3PO4-0.5	1.26144e+07	40
604	BRISK	NaOH-1	1.43546e+07	40
605	BRISK	Physical	2.77957e+07	60
606	BRISK	ZnCl	1.58876e+07	60
607	BRISK	H3PO4-0.25	6.50041e+06	60
608	BRISK	H3PO4-0.5	6.11977e+06	60
609	BRISK	NaOH-1	4.90719e+06	60
611	BRISK	Physical	2.56494e+07	80
612	BRISK	ZnCl	1.4992e+07	80
613	BRISK	H3PO4-0.25	4.12861e+06	80
614	BRISK	H3PO4-0.5	4.16473e+06	80
615	BRISK	NaOH-1	1.81631e+07	80
617	BRISK	Physical	3.50101e+07	100
618	BRISK	ZnCl	1.55129e+07	100
619	BRISK	H3PO4-0.25	4.48781e+06	100
620	BRISK	H3PO4-0.5	7.11104e+06	100
621	BRISK	NaOH-1	1.05308e+07	100
623	ORB	Physical	1.78969e+07	20
624	ORB	ZnCl	2.8873e+07	20
625	ORB	H3PO4-0.25	2.09575e+07	20
626	ORB	H3PO4-0.5	4.30009e+07	20
629	ORB	Physical	2.22517e+07	40
630	ORB	ZnCl	2.90821e+07	40
631	ORB	H3PO4-0.25	1.45907e+07	40
633	ORB	NaOH-1	3.6312e+07	40
635	ORB	Physical	1.14503e+07	60
639	ORB	NaOH-1	1.27498e+07	60
641	ORB	Physical	1.04347e+07	80
643	ORB	H3PO4-0.25	6.79315e+06	80
648	ORB	ZnCl	2.0013e+07	100
652	SURF	Raw	1.25686e+07	20
653	SURF	Physical	8.08546e+06	20
654	SURF	ZnCl	1.5371e+07	20
655	SURF	H3PO4-0.25	1.63894e+06	20
656	SURF	H3PO4-0.5	7.4896e+06	20
657	SURF	NaOH-1	1.71125e+07	20
658	SURF	Raw	6.11581e+06	40
659	SURF	Physical	6.85927e+06	40
660	SURF	ZnCl	8.90671e+06	40
661	SURF	H3PO4-0.25	2.26085e+06	40
662	SURF	H3PO4-0.5	6.38813e+06	40
663	SURF	NaOH-1	1.44698e+07	40
664	SURF	Raw	1.21888e+07	60
665	SURF	Physical	5.12855e+06	60
666	SURF	ZnCl	8.26061e+06	60
667	SURF	H3PO4-0.25	1.40408e+06	60
668	SURF	H3PO4-0.5	5.62833e+06	60
669	SURF	NaOH-1	5.86982e+06	60
670	SURF	Raw	1.2669e+07	80
671	SURF	Physical	6.26155e+06	80
672	SURF	ZnCl	9.49018e+06	80
673	SURF	H3PO4-0.25	1.93841e+06	80
674	SURF	H3PO4-0.5	5.00964e+06	80
675	SURF	NaOH-1	1.26831e+07	80
676	SURF	Raw	9.74822e+06	100
677	SURF	Physical	5.15275e+06	100
678	SURF	ZnCl	7.36379e+06	100
679	SURF	H3PO4-0.25	1.27966e+06	100
680	SURF	H3PO4-0.5	4.88432e+06	100
681	SURF	NaOH-1	5.03883e+06	100
682	KAZE	Raw	1.63526e+07	20
683	KAZE	Physical	8.92872e+06	20
684	KAZE	ZnCl	1.49355e+07	20
685	KAZE	H3PO4-0.25	5.55946e+06	20
686	KAZE	H3PO4-0.5	5.64635e+06	20
687	KAZE	NaOH-1	3.38674e+07	20
688	KAZE	Raw	2.43256e+06	40
689	KAZE	Physical	7.38185e+06	40
690	KAZE	ZnCl	1.2618e+07	40
691	KAZE	H3PO4-0.25	4.01132e+06	40
692	KAZE	H3PO4-0.5	6.02666e+06	40
693	KAZE	NaOH-1	1.329e+07	40
694	KAZE	Raw	5.07013e+06	60
695	KAZE	Physical	5.08788e+06	60
696	KAZE	ZnCl	8.46877e+06	60
697	KAZE	H3PO4-0.25	2.20643e+06	60
698	KAZE	H3PO4-0.5	3.32169e+06	60
699	KAZE	NaOH-1	4.1199e+06	60
700	KAZE	Raw	3.78365e+06	80
701	KAZE	Physical	5.8814e+06	80
702	KAZE	ZnCl	1.0918e+07	80
703	KAZE	H3PO4-0.25	3.26375e+06	80
704	KAZE	H3PO4-0.5	4.1495e+06	80
705	KAZE	NaOH-1	1.28048e+07	80
706	KAZE	Raw	4.18094e+06	100
707	KAZE	Physical	5.89083e+06	100
708	KAZE	ZnCl	8.80826e+06	100
709	KAZE	H3PO4-0.25	2.37256e+06	100
710	KAZE	H3PO4-0.5	4.7646e+06	100
711	KAZE	NaOH-1	4.66718e+06	100
712	ME	Raw	5.69352e+07	20
713	ME	Physical	3.79981e+06	20
714	ME	ZnCl	9.0858e+06	20
715	ME	H3PO4-0.25	2.6522e+06	20
716	ME	H3PO4-0.5	7.29872e+06	20
717	ME	NaOH-1	1.28336e+07	20
718	ME	Raw	4.79499e+06	40
719	ME	Physical	1.43206e+07	40
720	ME	ZnCl	8.00465e+06	40
721	ME	H3PO4-0.25	2.79586e+06	40
722	ME	H3PO4-0.5	4.0401e+06	40
723	ME	NaOH-1	6.26188e+06	40
724	ME	Raw	7.13068e+06	60
725	ME	Physical	2.91371e+07	60
726	ME	ZnCl	9.53782e+06	60
727	ME	H3PO4-0.25	9.35116e+06	60
728	ME	H3PO4-0.5	3.78687e+06	60
729	ME	NaOH-1	5.01203e+06	60
730	ME	Raw	1.52718e+07	80
731	ME	Physical	2.20619e+07	80
732	ME	ZnCl	6.14767e+06	80
733	ME	H3PO4-0.25	5.28497e+06	80
734	ME	H3PO4-0.5	9.1166e+06	80
735	ME	NaOH-1	8.24334e+06	80
736	ME	Raw	4.19425e+06	100
737	ME	Physical	1.55664e+07	100
738	ME	ZnCl	1.10956e+07	100
739	ME	H3PO4-0.25	4.61678e+06	100
740	ME	H3PO4-0.5	3.31209e+06	100
741	ME	NaOH-1	7.55041e+06	100
742	Harris	Raw	3.00427e+07	20
743	Harris	Physical	1.88738e+06	20
744	Harris	ZnCl	1.31251e+07	20
745	Harris	H3PO4-0.25	5.52978e+06	20
746	Harris	H3PO4-0.5	1.09791e+07	20
747	Harris	NaOH-1	1.74906e+07	20
748	Harris	Raw	4.98915e+06	40
749	Harris	Physical	3.58863e+06	40
750	Harris	ZnCl	1.30867e+07	40
751	Harris	H3PO4-0.25	2.19759e+06	40
752	Harris	H3PO4-0.5	9.65599e+06	40
753	Harris	NaOH-1	6.16129e+06	40
754	Harris	Raw	5.44369e+06	60
755	Harris	Physical	6.63117e+06	60
756	Harris	ZnCl	1.40181e+07	60
757	Harris	H3PO4-0.25	1.19437e+07	60
758	Harris	H3PO4-0.5	4.63244e+06	60
759	Harris	NaOH-1	8.0981e+06	60
760	Harris	Raw	4.63002e+06	80
761	Harris	Physical	7.72783e+06	80
762	Harris	ZnCl	1.19875e+07	80
763	Harris	H3PO4-0.25	6.85344e+06	80
764	Harris	H3PO4-0.5	4.70383e+06	80
765	Harris	NaOH-1	9.11487e+06	80
766	Harris	Raw	4.3707e+06	100
767	Harris	Physical	5.26571e+06	100
768	Harris	ZnCl	1.2488e+07	100
769	Harris	H3PO4-0.25	6.36705e+06	100
770	Harris	H3PO4-0.5	3.83336e+06	100
771	Harris	NaOH-1	6.09925e+06	100
772	BRISK	Physical	2.43426e+07	20
773	BRISK	ZnCl	1.87422e+07	20
774	BRISK	H3PO4-0.25	-816685	20
775	BRISK	H3PO4-0.5	2.26388e+07	20
776	BRISK	NaOH-1	9.6532e+06	20
778	BRISK	Physical	2.10616e+07	40
779	BRISK	ZnCl	1.53929e+07	40
780	BRISK	H3PO4-0.25	6.74153e+06	40
781	BRISK	H3PO4-0.5	6.16439e+06	40
782	BRISK	NaOH-1	1.29415e+07	40
785	BRISK	ZnCl	1.0391e+07	60
786	BRISK	H3PO4-0.25	1.10456e+07	60
787	BRISK	H3PO4-0.5	7.21548e+06	60
788	BRISK	NaOH-1	1.14744e+07	60
789	BRISK	Physical	3.33971e+07	80
790	BRISK	ZnCl	1.1768e+07	80
791	BRISK	H3PO4-0.25	1.15037e+07	80
793	BRISK	NaOH-1	1.00295e+07	80
795	BRISK	Physical	2.83338e+07	100
796	BRISK	ZnCl	1.57588e+07	100
797	BRISK	H3PO4-0.25	6.89261e+06	100
799	BRISK	NaOH-1	9.06476e+06	100
800	ORB	Raw	1.54072e+07	20
801	ORB	Physical	5.132e+07	20
803	ORB	H3PO4-0.25	2.78215e+07	20
804	ORB	H3PO4-0.5	2.01209e+07	20
805	ORB	NaOH-1	4.85632e+07	20
806	ORB	Raw	7.61483e+06	40
807	ORB	Physical	1.34673e+07	40
808	ORB	ZnCl	2.34855e+07	40
809	ORB	H3PO4-0.25	1.9045e+07	40
811	ORB	NaOH-1	2.87752e+07	40
814	ORB	ZnCl	1.99382e+07	60
815	ORB	H3PO4-0.25	8.70969e+06	60
816	ORB	H3PO4-0.5	1.63039e+07	60
817	ORB	NaOH-1	2.30034e+07	60
819	ORB	Physical	1.42878e+07	80
821	ORB	H3PO4-0.25	8.17392e+06	80
822	ORB	H3PO4-0.5	1.77143e+07	80
824	ORB	Raw	5.56882e+06	100
829	ORB	NaOH-1	1.30658e+07	100
830	SURF	Raw	1.74754e+07	20
831	SURF	Physical	9.53526e+06	20
832	SURF	ZnCl	1.30598e+07	20
833	SURF	H3PO4-0.25	1.521e+06	20
834	SURF	H3PO4-0.5	8.73321e+06	20
835	SURF	NaOH-1	9.13937e+06	20
836	SURF	Raw	6.11528e+06	40
837	SURF	Physical	5.24093e+06	40
838	SURF	ZnCl	9.59806e+06	40
839	SURF	H3PO4-0.25	1.84542e+06	40
840	SURF	H3PO4-0.5	4.33477e+06	40
841	SURF	NaOH-1	7.44863e+06	40
842	SURF	Raw	1.57807e+07	60
843	SURF	Physical	5.82069e+06	60
844	SURF	ZnCl	7.17783e+06	60
845	SURF	H3PO4-0.25	3.98666e+06	60
846	SURF	H3PO4-0.5	4.90988e+06	60
847	SURF	NaOH-1	7.31211e+06	60
848	SURF	Raw	1.0342e+07	80
849	SURF	Physical	5.0176e+06	80
850	SURF	ZnCl	5.28165e+06	80
851	SURF	H3PO4-0.25	2.87482e+06	80
852	SURF	H3PO4-0.5	4.18096e+06	80
853	SURF	NaOH-1	8.73083e+06	80
854	SURF	Raw	1.15466e+07	100
855	SURF	Physical	7.78019e+06	100
856	SURF	ZnCl	5.8344e+06	100
857	SURF	H3PO4-0.25	1.90505e+06	100
858	SURF	H3PO4-0.5	4.7269e+06	100
859	SURF	NaOH-1	5.84138e+06	100
860	KAZE	Raw	1.61356e+07	20
861	KAZE	Physical	1.5489e+07	20
862	KAZE	ZnCl	1.11996e+07	20
863	KAZE	H3PO4-0.25	3.83773e+06	20
864	KAZE	H3PO4-0.5	1.26011e+07	20
865	KAZE	NaOH-1	1.84719e+07	20
866	KAZE	Raw	2.55161e+06	40
867	KAZE	Physical	5.40773e+06	40
868	KAZE	ZnCl	8.41663e+06	40
869	KAZE	H3PO4-0.25	2.46328e+06	40
870	KAZE	H3PO4-0.5	3.16133e+06	40
871	KAZE	NaOH-1	5.54609e+06	40
872	KAZE	Raw	4.98373e+06	60
873	KAZE	Physical	6.7521e+06	60
874	KAZE	ZnCl	7.82475e+06	60
875	KAZE	H3PO4-0.25	3.46503e+06	60
876	KAZE	H3PO4-0.5	2.53088e+06	60
877	KAZE	NaOH-1	6.69461e+06	60
878	KAZE	Raw	2.79021e+06	80
879	KAZE	Physical	6.05136e+06	80
880	KAZE	ZnCl	6.57289e+06	80
882	KAZE	H3PO4-0.5	3.45231e+06	80
883	KAZE	NaOH-1	6.71039e+06	80
884	KAZE	Raw	3.293e+06	100
885	KAZE	Physical	5.44159e+06	100
886	KAZE	ZnCl	9.9117e+06	100
887	KAZE	H3PO4-0.25	3.57698e+06	100
888	KAZE	H3PO4-0.5	4.17438e+06	100
889	KAZE	NaOH-1	5.64064e+06	100
890	ME	Raw	1.49824e+07	20
891	ME	Physical	1.92723e+07	20
892	ME	ZnCl	1.19615e+07	20
893	ME	H3PO4-0.25	883862	20
894	ME	H3PO4-0.5	6.4158e+06	20
895	ME	NaOH-1	1.38401e+07	20
896	ME	Raw	4.68909e+06	40
897	ME	Physical	2.31233e+07	40
898	ME	ZnCl	8.69436e+06	40
899	ME	H3PO4-0.25	6.29433e+06	40
900	ME	H3PO4-0.5	2.35146e+07	40
901	ME	NaOH-1	3.20659e+06	40
902	ME	Raw	2.38298e+07	60
903	ME	Physical	4.72709e+06	60
904	ME	ZnCl	7.36113e+06	60
905	ME	H3PO4-0.25	4.98346e+06	60
906	ME	H3PO4-0.5	1.12836e+07	60
907	ME	NaOH-1	7.87122e+06	60
908	ME	Raw	7.9973e+06	80
909	ME	Physical	2.22208e+07	80
910	ME	ZnCl	8.75219e+06	80
911	ME	H3PO4-0.25	3.82929e+06	80
912	ME	H3PO4-0.5	3.3699e+06	80
913	ME	NaOH-1	1.10607e+07	80
914	ME	Raw	1.5314e+07	100
915	ME	Physical	1.51174e+07	100
916	ME	ZnCl	1.11859e+07	100
917	ME	H3PO4-0.25	5.09724e+06	100
918	ME	H3PO4-0.5	3.34659e+06	100
919	ME	NaOH-1	7.57181e+06	100
920	Harris	Raw	1.52231e+07	20
921	Harris	Physical	2.08846e+07	20
922	Harris	ZnCl	2.30372e+07	20
923	Harris	H3PO4-0.25	4.27813e+06	20
924	Harris	H3PO4-0.5	7.15414e+06	20
925	Harris	NaOH-1	1.87491e+07	20
926	Harris	Raw	3.07538e+06	40
927	Harris	Physical	5.53126e+06	40
928	Harris	ZnCl	1.60815e+07	40
929	Harris	H3PO4-0.25	6.79708e+06	40
930	Harris	H3PO4-0.5	7.11503e+06	40
931	Harris	NaOH-1	4.61941e+06	40
932	Harris	Raw	8.0709e+06	60
933	Harris	Physical	3.54024e+06	60
934	Harris	ZnCl	1.08525e+07	60
935	Harris	H3PO4-0.25	6.39282e+06	60
936	Harris	H3PO4-0.5	8.25826e+06	60
937	Harris	NaOH-1	8.96518e+06	60
938	Harris	Raw	4.50374e+06	80
939	Harris	Physical	4.27531e+06	80
940	Harris	ZnCl	1.06624e+07	80
941	Harris	H3PO4-0.25	7.61986e+06	80
942	Harris	H3PO4-0.5	3.62265e+06	80
943	Harris	NaOH-1	8.459e+06	80
944	Harris	Raw	4.66769e+06	100
945	Harris	Physical	6.60663e+06	100
946	Harris	ZnCl	1.31195e+07	100
947	Harris	H3PO4-0.25	6.18512e+06	100
948	Harris	H3PO4-0.5	3.87489e+06	100
949	Harris	NaOH-1	5.68957e+06	100
950	BRISK	Physical	3.28921e+07	20
951	BRISK	ZnCl	1.87091e+07	20
952	BRISK	H3PO4-0.25	3.84052e+06	20
953	BRISK	H3PO4-0.5	2.67195e+07	20
954	BRISK	NaOH-1	1.30912e+07	20
956	BRISK	Physical	2.89642e+07	40
957	BRISK	ZnCl	2.14567e+07	40
958	BRISK	H3PO4-0.25	3.42601e+06	40
959	BRISK	H3PO4-0.5	5.44955e+06	40
960	BRISK	NaOH-1	8.49086e+06	40
962	BRISK	ZnCl	1.61424e+07	60
963	BRISK	H3PO4-0.25	8.37513e+06	60
964	BRISK	H3PO4-0.5	6.41545e+06	60
967	BRISK	Physical	4.06801e+07	80
968	BRISK	ZnCl	1.25581e+07	80
969	BRISK	H3PO4-0.25	7.37492e+06	80
970	BRISK	H3PO4-0.5	5.26967e+06	80
971	BRISK	NaOH-1	8.12527e+06	80
972	BRISK	Raw	2.89801e+07	100
973	BRISK	Physical	2.42429e+07	100
974	BRISK	ZnCl	1.93293e+07	100
975	BRISK	H3PO4-0.25	1.15871e+07	100
976	BRISK	H3PO4-0.5	5.97864e+06	100
977	BRISK	NaOH-1	8.59181e+06	100
978	ORB	Raw	1.67203e+07	20
979	ORB	Physical	1.52082e+07	20
980	ORB	ZnCl	2.66781e+07	20
981	ORB	H3PO4-0.25	2.23521e+07	20
983	ORB	NaOH-1	4.19013e+07	20
984	ORB	Raw	8.65882e+06	40
987	ORB	H3PO4-0.25	1.1158e+07	40
990	ORB	Raw	5.13907e+06	60
991	ORB	Physical	1.24332e+07	60
992	ORB	ZnCl	2.11225e+07	60
993	ORB	H3PO4-0.25	9.24163e+06	60
994	ORB	H3PO4-0.5	1.4194e+07	60
997	ORB	Physical	1.60503e+07	80
1000	ORB	H3PO4-0.5	1.05474e+07	80
1003	ORB	Physical	1.51616e+07	100
1004	ORB	ZnCl	2.09799e+07	100
1005	ORB	H3PO4-0.25	7.98323e+06	100
1007	ORB	NaOH-1	1.3505e+07	100
1008	SURF	Raw	1.57837e+07	20
1009	SURF	Physical	9.64062e+06	20
1010	SURF	ZnCl	1.26621e+07	20
1011	SURF	H3PO4-0.25	1.31767e+06	20
1012	SURF	H3PO4-0.5	7.53389e+06	20
1013	SURF	NaOH-1	9.09883e+06	20
1014	SURF	Raw	1.43212e+07	40
1015	SURF	Physical	7.05041e+06	40
1016	SURF	ZnCl	1.12847e+07	40
1017	SURF	H3PO4-0.25	6.0022e+06	40
1018	SURF	H3PO4-0.5	3.85947e+06	40
1019	SURF	NaOH-1	4.04439e+06	40
1020	SURF	Raw	1.42304e+07	60
1021	SURF	Physical	4.9409e+06	60
1022	SURF	ZnCl	8.2487e+06	60
1023	SURF	H3PO4-0.25	1.81316e+06	60
1024	SURF	H3PO4-0.5	7.46518e+06	60
1025	SURF	NaOH-1	7.10103e+06	60
1026	SURF	Raw	1.07979e+07	80
1027	SURF	Physical	5.44414e+06	80
1028	SURF	ZnCl	6.11663e+06	80
1029	SURF	H3PO4-0.25	3.46915e+06	80
1030	SURF	H3PO4-0.5	4.60649e+06	80
1031	SURF	NaOH-1	8.38058e+06	80
1032	SURF	Raw	3.84196e+06	100
1033	SURF	Physical	7.64885e+06	100
1034	SURF	ZnCl	6.4864e+06	100
1035	SURF	H3PO4-0.25	2.57802e+06	100
1036	SURF	H3PO4-0.5	4.50772e+06	100
1037	SURF	NaOH-1	5.33862e+06	100
1038	KAZE	Raw	1.71684e+07	20
1039	KAZE	Physical	8.06694e+06	20
1040	KAZE	ZnCl	1.0295e+07	20
1041	KAZE	H3PO4-0.25	6.19689e+06	20
1042	KAZE	H3PO4-0.5	6.02457e+06	20
1043	KAZE	NaOH-1	1.87172e+07	20
1044	KAZE	Raw	6.68647e+06	40
1045	KAZE	Physical	7.73904e+06	40
1046	KAZE	ZnCl	1.09116e+07	40
1047	KAZE	H3PO4-0.25	4.6288e+06	40
1048	KAZE	H3PO4-0.5	4.52404e+06	40
1049	KAZE	NaOH-1	8.31292e+06	40
1050	KAZE	Raw	4.72277e+06	60
1051	KAZE	Physical	5.4919e+06	60
1052	KAZE	ZnCl	8.72433e+06	60
1053	KAZE	H3PO4-0.25	2.83762e+06	60
1054	KAZE	H3PO4-0.5	5.53389e+06	60
1055	KAZE	NaOH-1	8.42576e+06	60
1056	KAZE	Raw	4.67199e+06	80
1057	KAZE	Physical	4.96149e+06	80
1058	KAZE	ZnCl	7.76287e+06	80
1059	KAZE	H3PO4-0.25	3.35685e+06	80
1060	KAZE	H3PO4-0.5	3.70047e+06	80
1061	KAZE	NaOH-1	1.03482e+07	80
1062	KAZE	Raw	1.69161e+06	100
1063	KAZE	Physical	5.45232e+06	100
1064	KAZE	ZnCl	9.82648e+06	100
1065	KAZE	H3PO4-0.25	3.22918e+06	100
1066	KAZE	H3PO4-0.5	3.72783e+06	100
1067	KAZE	NaOH-1	5.30321e+06	100
1068	ME	Raw	3.4692e+07	20
1069	ME	Physical	4.65434e+06	20
1070	ME	ZnCl	1.51995e+07	20
1071	ME	H3PO4-0.25	8.1973e+06	20
1072	ME	H3PO4-0.5	7.09128e+06	20
1073	ME	NaOH-1	2.29877e+06	20
1074	ME	Raw	4.71339e+06	40
1075	ME	Physical	2.13241e+07	40
1076	ME	ZnCl	1.34115e+07	40
1077	ME	H3PO4-0.25	4.51582e+06	40
1078	ME	H3PO4-0.5	1.17231e+07	40
1079	ME	NaOH-1	4.49509e+06	40
1080	ME	Raw	9.93703e+06	60
1081	ME	Physical	1.62915e+07	60
1082	ME	ZnCl	1.07564e+07	60
1083	ME	H3PO4-0.25	7.37558e+06	60
1084	ME	H3PO4-0.5	3.76437e+06	60
1085	ME	NaOH-1	1.20613e+07	60
1086	ME	Raw	1.50349e+07	80
1087	ME	Physical	7.52057e+06	80
1088	ME	ZnCl	8.11318e+06	80
1089	ME	H3PO4-0.25	5.78861e+06	80
1090	ME	H3PO4-0.5	3.68188e+06	80
1091	ME	NaOH-1	9.5044e+06	80
1092	ME	Raw	3.55957e+06	100
1093	ME	Physical	1.89842e+07	100
1094	ME	ZnCl	8.6979e+06	100
1095	ME	H3PO4-0.25	5.69854e+06	100
1096	ME	H3PO4-0.5	1.01753e+07	100
1097	ME	NaOH-1	6.58548e+06	100
1098	Harris	Raw	3.20586e+07	20
1099	Harris	Physical	1.82135e+06	20
1100	Harris	ZnCl	2.2559e+07	20
1101	Harris	H3PO4-0.25	8.57549e+06	20
1102	Harris	H3PO4-0.5	6.18692e+06	20
1103	Harris	NaOH-1	8.2111e+06	20
1104	Harris	Raw	5.67013e+06	40
1105	Harris	Physical	5.3899e+06	40
1106	Harris	ZnCl	1.99283e+07	40
1107	Harris	H3PO4-0.25	4.84786e+06	40
1108	Harris	H3PO4-0.5	4.20207e+06	40
1109	Harris	NaOH-1	4.60874e+06	40
1110	Harris	Raw	4.63224e+06	60
1111	Harris	Physical	5.96636e+06	60
1112	Harris	ZnCl	1.25176e+07	60
1113	Harris	H3PO4-0.25	8.70129e+06	60
1114	Harris	H3PO4-0.5	2.3696e+06	60
1115	Harris	NaOH-1	8.66529e+06	60
1116	Harris	Raw	5.73346e+06	80
1117	Harris	Physical	6.17193e+06	80
1118	Harris	ZnCl	1.12104e+07	80
1119	Harris	H3PO4-0.25	7.84396e+06	80
1120	Harris	H3PO4-0.5	3.76749e+06	80
1121	Harris	NaOH-1	1.02619e+07	80
1122	Harris	Raw	5.60148e+06	100
1123	Harris	Physical	5.70765e+06	100
1124	Harris	ZnCl	1.14149e+07	100
1125	Harris	H3PO4-0.25	3.25215e+06	100
1126	Harris	H3PO4-0.5	4.61929e+06	100
1127	Harris	NaOH-1	6.18843e+06	100
1129	BRISK	Physical	3.17889e+07	20
1130	BRISK	ZnCl	2.32176e+07	20
1131	BRISK	H3PO4-0.25	9.89919e+06	20
1132	BRISK	H3PO4-0.5	1.27679e+07	20
1133	BRISK	NaOH-1	5.6612e+06	20
1134	BRISK	Physical	2.93117e+07	40
1135	BRISK	ZnCl	2.68156e+07	40
1136	BRISK	H3PO4-0.25	7.4763e+06	40
1137	BRISK	H3PO4-0.5	7.39774e+06	40
1138	BRISK	NaOH-1	9.63049e+06	40
1139	BRISK	Physical	3.66792e+07	60
1140	BRISK	ZnCl	2.00426e+07	60
1141	BRISK	H3PO4-0.25	7.05232e+06	60
1142	BRISK	H3PO4-0.5	3.41975e+06	60
1143	BRISK	NaOH-1	9.66548e+06	60
1144	BRISK	Raw	-6.47987e+06	80
1145	BRISK	Physical	2.82541e+07	80
1146	BRISK	ZnCl	1.49415e+07	80
1148	BRISK	H3PO4-0.5	6.63e+06	80
1149	BRISK	NaOH-1	9.51411e+06	80
1150	BRISK	Physical	2.93412e+07	100
1151	BRISK	ZnCl	1.30587e+07	100
1152	BRISK	H3PO4-0.25	8.10468e+06	100
1153	BRISK	H3PO4-0.5	5.14907e+06	100
1154	BRISK	NaOH-1	1.0681e+07	100
1155	ORB	Raw	1.70101e+07	20
1156	ORB	Physical	1.45714e+07	20
1157	ORB	ZnCl	3.95432e+07	20
1160	ORB	NaOH-1	7.45594e+06	20
1163	ORB	ZnCl	2.22198e+07	40
1164	ORB	H3PO4-0.25	1.86787e+07	40
1165	ORB	H3PO4-0.5	2.19724e+07	40
1166	ORB	NaOH-1	1.51014e+07	40
1167	ORB	Raw	6.71484e+06	60
1169	ORB	ZnCl	2.49741e+07	60
1170	ORB	H3PO4-0.25	1.13595e+07	60
1171	ORB	H3PO4-0.5	1.68285e+07	60
1172	ORB	NaOH-1	2.11795e+07	60
1174	ORB	Physical	2.00075e+07	80
1175	ORB	ZnCl	2.33543e+07	80
1181	ORB	ZnCl	1.83031e+07	100
1183	ORB	H3PO4-0.5	1.21094e+07	100
1185	SURF	Raw	8.83471e+06	20
1186	SURF	Physical	1.08099e+07	20
1187	SURF	ZnCl	1.12676e+07	20
1188	SURF	H3PO4-0.25	1.43509e+06	20
1189	SURF	H3PO4-0.5	5.86325e+06	20
1190	SURF	NaOH-1	7.04163e+06	20
1191	SURF	Raw	1.27921e+07	40
1192	SURF	Physical	7.09575e+06	40
1193	SURF	ZnCl	1.02789e+07	40
1194	SURF	H3PO4-0.25	1.19834e+06	40
1195	SURF	H3PO4-0.5	6.95596e+06	40
1196	SURF	NaOH-1	8.14683e+06	40
1197	SURF	Raw	1.61439e+07	60
1198	SURF	Physical	5.8983e+06	60
1199	SURF	ZnCl	1.14393e+07	60
1200	SURF	H3PO4-0.25	1.84463e+06	60
1201	SURF	H3PO4-0.5	2.88986e+06	60
1202	SURF	NaOH-1	7.61547e+06	60
1203	SURF	Raw	1.77072e+07	80
1204	SURF	Physical	8.09865e+06	80
1205	SURF	ZnCl	6.92607e+06	80
1206	SURF	H3PO4-0.25	1.83313e+06	80
1207	SURF	H3PO4-0.5	4.35795e+06	80
1208	SURF	NaOH-1	7.28103e+06	80
1209	SURF	Raw	3.42516e+07	100
1210	SURF	Physical	4.20999e+06	100
1211	SURF	ZnCl	5.61495e+06	100
1212	SURF	H3PO4-0.25	2.47102e+06	100
1213	SURF	H3PO4-0.5	3.72081e+06	100
1214	SURF	NaOH-1	8.04944e+06	100
1215	KAZE	Raw	1.45722e+07	20
1216	KAZE	Physical	6.49849e+06	20
1217	KAZE	ZnCl	1.08439e+07	20
1218	KAZE	H3PO4-0.25	5.26249e+06	20
1219	KAZE	H3PO4-0.5	6.14067e+06	20
1220	KAZE	NaOH-1	1.10705e+07	20
1221	KAZE	Raw	2.86349e+06	40
1222	KAZE	Physical	6.62438e+06	40
1223	KAZE	ZnCl	1.21645e+07	40
1224	KAZE	H3PO4-0.25	3.53915e+06	40
1225	KAZE	H3PO4-0.5	5.80963e+06	40
1226	KAZE	NaOH-1	1.07908e+07	40
1227	KAZE	Raw	7.63065e+06	60
1228	KAZE	Physical	5.51407e+06	60
1229	KAZE	ZnCl	1.0318e+07	60
1230	KAZE	H3PO4-0.25	2.997e+06	60
1231	KAZE	H3PO4-0.5	2.73514e+06	60
1232	KAZE	NaOH-1	8.65172e+06	60
1233	KAZE	Raw	4.74363e+06	80
1234	KAZE	Physical	6.126e+06	80
1235	KAZE	ZnCl	7.37393e+06	80
1236	KAZE	H3PO4-0.25	3.93796e+06	80
1237	KAZE	H3PO4-0.5	5.26277e+06	80
1238	KAZE	NaOH-1	7.68295e+06	80
1239	KAZE	Raw	3.19632e+06	100
1240	KAZE	Physical	4.60451e+06	100
1241	KAZE	ZnCl	7.76573e+06	100
1242	KAZE	H3PO4-0.25	3.24416e+06	100
1243	KAZE	H3PO4-0.5	4.91354e+06	100
1244	KAZE	NaOH-1	6.49422e+06	100
1245	ME	Raw	4.26507e+07	20
1246	ME	Physical	3.52525e+06	20
1247	ME	ZnCl	8.29931e+06	20
1248	ME	H3PO4-0.25	4.11993e+06	20
1249	ME	H3PO4-0.5	6.17878e+06	20
1250	ME	NaOH-1	1.32489e+07	20
1251	ME	Raw	4.36695e+07	40
1252	ME	Physical	2.20734e+07	40
1253	ME	ZnCl	6.24571e+06	40
1254	ME	H3PO4-0.25	4.99439e+06	40
1255	ME	H3PO4-0.5	1.69307e+07	40
1256	ME	NaOH-1	2.2446e+06	40
1257	ME	Raw	3.59921e+06	60
1258	ME	Physical	2.39377e+07	60
1259	ME	ZnCl	9.54526e+06	60
1260	ME	H3PO4-0.25	3.51586e+06	60
1261	ME	H3PO4-0.5	3.58776e+06	60
1262	ME	NaOH-1	6.13883e+06	60
1263	ME	Raw	3.94247e+06	80
1264	ME	Physical	4.92001e+06	80
1265	ME	ZnCl	1.01889e+07	80
1266	ME	H3PO4-0.25	1.74905e+07	80
1267	ME	H3PO4-0.5	1.09365e+07	80
1268	ME	NaOH-1	1.06957e+07	80
1269	ME	Raw	4.13558e+06	100
1270	ME	Physical	7.58253e+06	100
1271	ME	ZnCl	9.07762e+06	100
1272	ME	H3PO4-0.25	1.14524e+07	100
1273	ME	H3PO4-0.5	2.85923e+06	100
1274	ME	NaOH-1	9.40001e+06	100
1275	Harris	Raw	1.18967e+07	20
1276	Harris	Physical	3.63242e+06	20
1277	Harris	ZnCl	1.30611e+07	20
1278	Harris	H3PO4-0.25	1.53897e+07	20
1279	Harris	H3PO4-0.5	6.36432e+06	20
1280	Harris	NaOH-1	8.07964e+06	20
1281	Harris	Raw	1.01296e+07	40
1282	Harris	Physical	9.96405e+06	40
1283	Harris	ZnCl	1.3549e+07	40
1284	Harris	H3PO4-0.25	7.08407e+06	40
1285	Harris	H3PO4-0.5	7.28795e+06	40
1286	Harris	NaOH-1	5.46531e+06	40
1287	Harris	Raw	4.1902e+06	60
1288	Harris	Physical	7.10492e+06	60
1289	Harris	ZnCl	1.43096e+07	60
1290	Harris	H3PO4-0.25	4.19589e+06	60
1291	Harris	H3PO4-0.5	4.22878e+06	60
1292	Harris	NaOH-1	5.8666e+06	60
1293	Harris	Raw	4.89582e+06	80
1294	Harris	Physical	4.05217e+06	80
1295	Harris	ZnCl	1.54535e+07	80
1296	Harris	H3PO4-0.25	8.25753e+06	80
1297	Harris	H3PO4-0.5	3.48747e+06	80
1298	Harris	NaOH-1	8.58168e+06	80
1299	Harris	Raw	4.70575e+06	100
1300	Harris	Physical	5.0597e+06	100
1301	Harris	ZnCl	1.26083e+07	100
1302	Harris	H3PO4-0.25	7.95849e+06	100
1303	Harris	H3PO4-0.5	3.68966e+06	100
1304	Harris	NaOH-1	8.66143e+06	100
1305	BRISK	Physical	2.10155e+07	20
1306	BRISK	ZnCl	2.06732e+07	20
1307	BRISK	H3PO4-0.25	407839	20
1308	BRISK	H3PO4-0.5	1.19765e+07	20
1309	BRISK	NaOH-1	3.37213e+07	20
1310	BRISK	Physical	2.77063e+07	40
1312	BRISK	H3PO4-0.25	1.34172e+06	40
1313	BRISK	H3PO4-0.5	2.03938e+07	40
1314	BRISK	NaOH-1	7.2296e+06	40
1315	BRISK	Physical	2.38778e+07	60
1316	BRISK	ZnCl	1.49814e+07	60
1317	BRISK	H3PO4-0.25	3.82959e+06	60
1318	BRISK	H3PO4-0.5	8.10353e+06	60
1319	BRISK	NaOH-1	9.84398e+06	60
1321	BRISK	Physical	1.97583e+07	80
1322	BRISK	ZnCl	1.55249e+07	80
1323	BRISK	H3PO4-0.25	1.05369e+07	80
1324	BRISK	H3PO4-0.5	3.59143e+06	80
1325	BRISK	NaOH-1	1.88314e+07	80
1327	BRISK	Physical	2.3278e+07	100
1328	BRISK	ZnCl	1.10032e+07	100
1329	BRISK	H3PO4-0.25	6.26445e+06	100
1330	BRISK	H3PO4-0.5	5.2364e+06	100
1332	ORB	Raw	1.50491e+07	20
1333	ORB	Physical	5.18885e+07	20
1334	ORB	ZnCl	1.88565e+07	20
1335	ORB	H3PO4-0.25	1.07693e+07	20
1337	ORB	NaOH-1	3.28701e+07	20
1339	ORB	Physical	1.78711e+07	40
1340	ORB	ZnCl	1.8953e+07	40
1341	ORB	H3PO4-0.25	1.89471e+07	40
1343	ORB	NaOH-1	3.19078e+07	40
1344	ORB	Raw	7.35102e+06	60
1345	ORB	Physical	1.95274e+07	60
1347	ORB	H3PO4-0.25	1.19916e+07	60
1353	ORB	H3PO4-0.25	8.27492e+06	80
1354	ORB	H3PO4-0.5	1.41002e+07	80
1355	ORB	NaOH-1	1.78261e+07	80
1356	ORB	Raw	7.47986e+06	100
1358	ORB	ZnCl	2.28384e+07	100
1362	SURF	Raw	1.44816e+07	20
1363	SURF	Physical	1.17035e+07	20
1364	SURF	ZnCl	9.76722e+06	20
1365	SURF	H3PO4-0.25	1.74055e+06	20
1366	SURF	H3PO4-0.5	9.04295e+06	20
1367	SURF	NaOH-1	1.22521e+07	20
1368	SURF	Raw	1.02034e+07	40
1369	SURF	Physical	6.56638e+06	40
1370	SURF	ZnCl	9.36408e+06	40
1371	SURF	H3PO4-0.25	1.5566e+06	40
1372	SURF	H3PO4-0.5	3.80729e+06	40
1373	SURF	NaOH-1	4.00367e+06	40
1374	SURF	Raw	1.14556e+07	60
1375	SURF	Physical	6.30658e+06	60
1376	SURF	ZnCl	7.18567e+06	60
1377	SURF	H3PO4-0.25	2.08248e+06	60
1378	SURF	H3PO4-0.5	4.81221e+06	60
1379	SURF	NaOH-1	7.47668e+06	60
1380	SURF	Raw	1.15111e+07	80
1381	SURF	Physical	4.70681e+06	80
1382	SURF	ZnCl	5.67939e+06	80
1383	SURF	H3PO4-0.25	1.50962e+06	80
1384	SURF	H3PO4-0.5	4.4054e+06	80
1385	SURF	NaOH-1	8.32262e+06	80
1386	SURF	Raw	6.9117e+06	100
1387	SURF	Physical	6.41885e+06	100
1388	SURF	ZnCl	5.48945e+06	100
1389	SURF	H3PO4-0.25	1.8002e+06	100
1390	SURF	H3PO4-0.5	4.63133e+06	100
1391	SURF	NaOH-1	9.26488e+06	100
1392	KAZE	Raw	1.15197e+07	20
1393	KAZE	Physical	1.6411e+07	20
1394	KAZE	ZnCl	1.16443e+07	20
1395	KAZE	H3PO4-0.25	5.27432e+06	20
1396	KAZE	H3PO4-0.5	6.04162e+06	20
1397	KAZE	NaOH-1	1.25543e+07	20
1398	KAZE	Raw	1.15103e+07	40
1399	KAZE	Physical	6.37783e+06	40
1400	KAZE	ZnCl	1.0367e+07	40
1401	KAZE	H3PO4-0.25	4.15519e+06	40
1402	KAZE	H3PO4-0.5	6.03255e+06	40
1403	KAZE	NaOH-1	7.68093e+06	40
1404	KAZE	Raw	3.94973e+06	60
1405	KAZE	Physical	7.36403e+06	60
1406	KAZE	ZnCl	9.23984e+06	60
1407	KAZE	H3PO4-0.25	3.56397e+06	60
1408	KAZE	H3PO4-0.5	4.64015e+06	60
1409	KAZE	NaOH-1	4.64301e+06	60
1410	KAZE	Raw	4.80624e+06	80
1411	KAZE	Physical	4.05456e+06	80
1412	KAZE	ZnCl	9.12935e+06	80
1413	KAZE	H3PO4-0.25	3.48553e+06	80
1414	KAZE	H3PO4-0.5	4.41205e+06	80
1415	KAZE	NaOH-1	7.52234e+06	80
1416	KAZE	Raw	3.72013e+06	100
1417	KAZE	Physical	5.63645e+06	100
1418	KAZE	ZnCl	5.41801e+06	100
1419	KAZE	H3PO4-0.25	3.48424e+06	100
1420	KAZE	H3PO4-0.5	3.93382e+06	100
1421	KAZE	NaOH-1	8.03324e+06	100
1422	ME	Raw	2.3019e+07	20
1423	ME	Physical	4.8819e+06	20
1424	ME	ZnCl	1.04695e+07	20
1425	ME	H3PO4-0.25	2.19301e+06	20
1426	ME	H3PO4-0.5	191077	20
1427	ME	NaOH-1	1.73099e+07	20
1428	ME	Raw	5.21435e+06	40
1429	ME	Physical	2.74018e+07	40
1430	ME	ZnCl	1.08183e+07	40
1431	ME	H3PO4-0.25	6.24111e+06	40
1432	ME	H3PO4-0.5	2.8901e+06	40
1433	ME	NaOH-1	2.29542e+06	40
1434	ME	Raw	1.62319e+07	60
1435	ME	Physical	1.6692e+07	60
1436	ME	ZnCl	9.4929e+06	60
1437	ME	H3PO4-0.25	3.93302e+06	60
1438	ME	H3PO4-0.5	3.04376e+06	60
1439	ME	NaOH-1	1.48449e+07	60
1440	ME	Raw	1.83052e+07	80
1441	ME	Physical	6.19119e+06	80
1442	ME	ZnCl	7.94602e+06	80
1443	ME	H3PO4-0.25	8.9041e+06	80
1444	ME	H3PO4-0.5	4.6925e+06	80
1445	ME	NaOH-1	8.57636e+06	80
1446	ME	Raw	2.26845e+07	100
1447	ME	Physical	1.84574e+07	100
1448	ME	ZnCl	1.08029e+07	100
1449	ME	H3PO4-0.25	9.48073e+06	100
1450	ME	H3PO4-0.5	1.93202e+07	100
1451	ME	NaOH-1	7.11475e+06	100
1452	Harris	Raw	2.41517e+07	20
1453	Harris	Physical	3.78286e+06	20
1454	Harris	ZnCl	1.04807e+07	20
1455	Harris	H3PO4-0.25	1.26749e+06	20
1456	Harris	H3PO4-0.5	2.90131e+06	20
1457	Harris	NaOH-1	1.57538e+07	20
1458	Harris	Raw	3.4245e+06	40
1459	Harris	Physical	4.40068e+06	40
1460	Harris	ZnCl	1.43304e+07	40
1461	Harris	H3PO4-0.25	8.0991e+06	40
1462	Harris	H3PO4-0.5	4.74945e+06	40
1463	Harris	NaOH-1	4.5473e+06	40
1464	Harris	Raw	4.74933e+06	60
1465	Harris	Physical	5.59836e+06	60
1466	Harris	ZnCl	1.3335e+07	60
1467	Harris	H3PO4-0.25	4.68144e+06	60
1468	Harris	H3PO4-0.5	3.64114e+06	60
1469	Harris	NaOH-1	1.32231e+07	60
1470	Harris	Raw	5.62071e+06	80
1471	Harris	Physical	5.65048e+06	80
1472	Harris	ZnCl	1.055e+07	80
1473	Harris	H3PO4-0.25	5.73658e+06	80
1474	Harris	H3PO4-0.5	5.15107e+06	80
1475	Harris	NaOH-1	8.36885e+06	80
1476	Harris	Raw	5.29775e+06	100
1477	Harris	Physical	4.8482e+06	100
1478	Harris	ZnCl	1.13395e+07	100
1479	Harris	H3PO4-0.25	5.5734e+06	100
1480	Harris	H3PO4-0.5	7.08578e+06	100
1481	Harris	NaOH-1	7.57113e+06	100
1483	BRISK	Physical	3.57792e+07	20
1484	BRISK	ZnCl	1.31962e+07	20
1485	BRISK	H3PO4-0.25	7.97063e+06	20
1486	BRISK	H3PO4-0.5	7.2289e+06	20
1487	BRISK	NaOH-1	3.76223e+07	20
1488	BRISK	Physical	4.83094e+07	40
1489	BRISK	ZnCl	2.06749e+07	40
1490	BRISK	H3PO4-0.25	6.81418e+06	40
1491	BRISK	H3PO4-0.5	1.07681e+07	40
1492	BRISK	NaOH-1	8.57294e+06	40
1494	BRISK	Physical	4.14165e+07	60
1496	BRISK	H3PO4-0.25	5.49658e+06	60
1497	BRISK	H3PO4-0.5	6.244e+06	60
1498	BRISK	NaOH-1	1.58217e+07	60
1500	BRISK	Physical	1.9108e+07	80
1503	BRISK	H3PO4-0.5	7.23026e+06	80
1504	BRISK	NaOH-1	1.06924e+07	80
1506	BRISK	Physical	2.48968e+07	100
1507	BRISK	ZnCl	1.64546e+07	100
1508	BRISK	H3PO4-0.25	4.83613e+06	100
1509	BRISK	H3PO4-0.5	5.46553e+06	100
1510	BRISK	NaOH-1	7.87621e+06	100
1511	ORB	Raw	1.48593e+07	20
1512	ORB	Physical	3.15305e+07	20
1513	ORB	ZnCl	2.21298e+07	20
1514	ORB	H3PO4-0.25	3.70743e+07	20
1515	ORB	H3PO4-0.5	4.31234e+07	20
1516	ORB	NaOH-1	3.72402e+07	20
1517	ORB	Raw	1.0571e+07	40
1519	ORB	ZnCl	2.92133e+07	40
1524	ORB	Physical	1.92825e+07	60
1525	ORB	ZnCl	2.29169e+07	60
1527	ORB	H3PO4-0.5	2.61425e+07	60
1529	ORB	Raw	5.21773e+06	80
1530	ORB	Physical	1.10551e+07	80
1533	ORB	H3PO4-0.5	1.17113e+07	80
1535	ORB	Raw	5.25085e+06	100
1539	ORB	H3PO4-0.5	1.03379e+07	100
1541	SURF	Raw	1.44623e+07	20
1542	SURF	Physical	1.48789e+07	20
1543	SURF	ZnCl	1.11912e+07	20
1544	SURF	H3PO4-0.25	2.767e+06	20
1545	SURF	H3PO4-0.5	5.69297e+06	20
1546	SURF	NaOH-1	1.39166e+07	20
1547	SURF	Raw	1.24369e+07	40
1548	SURF	Physical	6.39522e+06	40
1549	SURF	ZnCl	9.79568e+06	40
1550	SURF	H3PO4-0.25	1.67827e+06	40
1551	SURF	H3PO4-0.5	5.52729e+06	40
1552	SURF	NaOH-1	4.01745e+06	40
1553	SURF	Raw	1.0342e+07	60
1554	SURF	Physical	5.97902e+06	60
1555	SURF	ZnCl	8.13219e+06	60
1556	SURF	H3PO4-0.25	2.01304e+06	60
1557	SURF	H3PO4-0.5	3.65972e+06	60
1558	SURF	NaOH-1	1.78566e+07	60
1559	SURF	Raw	9.61626e+06	80
1560	SURF	Physical	5.77359e+06	80
1561	SURF	ZnCl	6.7661e+06	80
1562	SURF	H3PO4-0.25	1.30543e+06	80
1563	SURF	H3PO4-0.5	4.28575e+06	80
1564	SURF	NaOH-1	1.00355e+07	80
1565	SURF	Raw	1.51178e+07	100
1566	SURF	Physical	5.1879e+06	100
1567	SURF	ZnCl	5.76223e+06	100
1568	SURF	H3PO4-0.25	1.84756e+06	100
1569	SURF	H3PO4-0.5	3.76917e+06	100
1570	SURF	NaOH-1	7.78847e+06	100
1571	KAZE	Raw	2.50961e+07	20
1572	KAZE	Physical	8.6443e+06	20
1573	KAZE	ZnCl	9.75656e+06	20
1574	KAZE	H3PO4-0.25	6.03847e+06	20
1575	KAZE	H3PO4-0.5	6.46974e+06	20
1576	KAZE	NaOH-1	2.65897e+07	20
1577	KAZE	Raw	5.65503e+06	40
1578	KAZE	Physical	5.70777e+06	40
1579	KAZE	ZnCl	1.35464e+07	40
1580	KAZE	H3PO4-0.25	3.18472e+06	40
1581	KAZE	H3PO4-0.5	3.73231e+06	40
1582	KAZE	NaOH-1	7.08399e+06	40
1583	KAZE	Raw	2.64771e+06	60
1584	KAZE	Physical	6.37492e+06	60
1585	KAZE	ZnCl	1.26758e+07	60
1586	KAZE	H3PO4-0.25	3.98104e+06	60
1587	KAZE	H3PO4-0.5	4.49727e+06	60
1588	KAZE	NaOH-1	1.16186e+07	60
1589	KAZE	Raw	4.08379e+06	80
1590	KAZE	Physical	7.0557e+06	80
1591	KAZE	ZnCl	7.25661e+06	80
1592	KAZE	H3PO4-0.25	3.06053e+06	80
1593	KAZE	H3PO4-0.5	5.09872e+06	80
1594	KAZE	NaOH-1	7.24116e+06	80
1595	KAZE	Raw	3.35946e+06	100
1596	KAZE	Physical	3.56254e+06	100
1597	KAZE	ZnCl	7.69239e+06	100
1598	KAZE	H3PO4-0.25	3.25616e+06	100
1599	KAZE	H3PO4-0.5	5.31334e+06	100
1600	KAZE	NaOH-1	6.80763e+06	100
1601	ME	Raw	1.21418e+07	20
1602	ME	Physical	2.74968e+07	20
1603	ME	ZnCl	9.37308e+06	20
1604	ME	H3PO4-0.25	3.3162e+06	20
1605	ME	H3PO4-0.5	1.13232e+07	20
1606	ME	NaOH-1	1.18883e+07	20
1607	ME	Raw	3.8851e+06	40
1608	ME	Physical	2.88034e+07	40
1609	ME	ZnCl	1.08902e+07	40
1610	ME	H3PO4-0.25	5.89522e+06	40
1611	ME	H3PO4-0.5	3.31414e+06	40
1612	ME	NaOH-1	4.60601e+06	40
1613	ME	Raw	3.92205e+06	60
1614	ME	Physical	4.42335e+06	60
1615	ME	ZnCl	1.20734e+07	60
1616	ME	H3PO4-0.25	5.23425e+06	60
1617	ME	H3PO4-0.5	1.212e+07	60
1618	ME	NaOH-1	1.05888e+07	60
1619	ME	Raw	2.91177e+07	80
1620	ME	Physical	1.93587e+07	80
1621	ME	ZnCl	9.47174e+06	80
1622	ME	H3PO4-0.25	1.67967e+07	80
1623	ME	H3PO4-0.5	3.51934e+06	80
1624	ME	NaOH-1	7.75357e+06	80
1625	ME	Raw	2.06804e+07	100
1626	ME	Physical	1.61398e+07	100
1627	ME	ZnCl	1.13592e+07	100
1628	ME	H3PO4-0.25	5.02161e+06	100
1629	ME	H3PO4-0.5	3.91586e+06	100
1630	ME	NaOH-1	7.14848e+06	100
1631	Harris	Raw	5.5932e+06	20
1632	Harris	Physical	1.05803e+07	20
1633	Harris	ZnCl	1.21847e+07	20
1634	Harris	H3PO4-0.25	4.46689e+06	20
1635	Harris	H3PO4-0.5	6.42479e+06	20
1636	Harris	NaOH-1	1.06863e+07	20
1637	Harris	Raw	4.81104e+06	40
1638	Harris	Physical	4.2472e+06	40
1639	Harris	ZnCl	1.99193e+07	40
1640	Harris	H3PO4-0.25	8.64393e+06	40
1641	Harris	H3PO4-0.5	4.01627e+06	40
1642	Harris	NaOH-1	8.34175e+06	40
1643	Harris	Raw	3.07893e+06	60
1644	Harris	Physical	4.51014e+06	60
1645	Harris	ZnCl	1.49206e+07	60
1646	Harris	H3PO4-0.25	6.08571e+06	60
1647	Harris	H3PO4-0.5	5.61821e+06	60
1648	Harris	NaOH-1	8.40475e+06	60
1649	Harris	Raw	6.4357e+06	80
1650	Harris	Physical	4.98446e+06	80
1651	Harris	ZnCl	1.12503e+07	80
1652	Harris	H3PO4-0.25	9.06847e+06	80
1653	Harris	H3PO4-0.5	4.90124e+06	80
1654	Harris	NaOH-1	7.50994e+06	80
1655	Harris	Raw	3.66711e+06	100
1656	Harris	Physical	5.99384e+06	100
1657	Harris	ZnCl	1.22417e+07	100
1658	Harris	H3PO4-0.25	3.18813e+06	100
1659	Harris	H3PO4-0.5	3.93366e+06	100
1660	Harris	NaOH-1	6.67566e+06	100
1661	BRISK	Raw	-6.47987e+06	20
1662	BRISK	Physical	2.87969e+07	20
1663	BRISK	ZnCl	1.88544e+07	20
1664	BRISK	H3PO4-0.25	7.23805e+06	20
1665	BRISK	H3PO4-0.5	2.98426e+07	20
1666	BRISK	NaOH-1	2.19778e+07	20
1668	BRISK	Physical	1.93689e+07	40
1669	BRISK	ZnCl	2.7018e+07	40
1670	BRISK	H3PO4-0.25	6.63855e+06	40
1671	BRISK	H3PO4-0.5	1.09736e+07	40
1672	BRISK	NaOH-1	7.94154e+06	40
1674	BRISK	Physical	3.28571e+07	60
1675	BRISK	ZnCl	1.72078e+07	60
1676	BRISK	H3PO4-0.25	1.32376e+07	60
1677	BRISK	H3PO4-0.5	1.11098e+07	60
1678	BRISK	NaOH-1	9.88673e+06	60
1680	BRISK	Physical	3.41701e+07	80
1681	BRISK	ZnCl	1.23619e+07	80
1682	BRISK	H3PO4-0.25	1.25274e+07	80
1683	BRISK	H3PO4-0.5	8.27136e+06	80
1684	BRISK	NaOH-1	2.07552e+07	80
1685	BRISK	Physical	3.46709e+07	100
1686	BRISK	ZnCl	1.59239e+07	100
1687	BRISK	H3PO4-0.25	8.87335e+06	100
1688	BRISK	H3PO4-0.5	5.39247e+06	100
1689	BRISK	NaOH-1	1.13901e+07	100
1690	ORB	Raw	1.21757e+07	20
1691	ORB	Physical	3.28957e+07	20
1693	ORB	H3PO4-0.25	2.8514e+07	20
1697	ORB	Physical	2.50293e+07	40
1698	ORB	ZnCl	2.59231e+07	40
1699	ORB	H3PO4-0.25	1.82646e+07	40
1700	ORB	H3PO4-0.5	2.6145e+07	40
1701	ORB	NaOH-1	2.20794e+07	40
1702	ORB	Raw	7.36931e+06	60
1704	ORB	ZnCl	2.24154e+07	60
1705	ORB	H3PO4-0.25	9.80477e+06	60
1708	ORB	Raw	7.48459e+06	80
1709	ORB	Physical	1.47911e+07	80
1710	ORB	ZnCl	1.87527e+07	80
1711	ORB	H3PO4-0.25	6.86298e+06	80
1713	ORB	NaOH-1	1.69869e+07	80
1714	ORB	Raw	6.02373e+06	100
1720	SURF	Raw	1.38964e+07	20
1721	SURF	Physical	1.17776e+07	20
1722	SURF	ZnCl	1.01522e+07	20
1723	SURF	H3PO4-0.25	3.74071e+06	20
1724	SURF	H3PO4-0.5	1.11006e+07	20
1725	SURF	NaOH-1	9.53256e+06	20
1726	SURF	Raw	1.1183e+07	40
1727	SURF	Physical	7.09797e+06	40
1728	SURF	ZnCl	9.96237e+06	40
1729	SURF	H3PO4-0.25	2.75822e+06	40
1730	SURF	H3PO4-0.5	7.36248e+06	40
1731	SURF	NaOH-1	6.56497e+06	40
1732	SURF	Raw	1.61888e+07	60
1733	SURF	Physical	5.38008e+06	60
1734	SURF	ZnCl	5.99497e+06	60
1735	SURF	H3PO4-0.25	2.58297e+06	60
1736	SURF	H3PO4-0.5	3.6901e+06	60
1737	SURF	NaOH-1	5.97573e+06	60
1738	SURF	Raw	1.4475e+07	80
1739	SURF	Physical	4.6826e+06	80
1740	SURF	ZnCl	5.1935e+06	80
1741	SURF	H3PO4-0.25	1.73813e+06	80
1742	SURF	H3PO4-0.5	5.31227e+06	80
1743	SURF	NaOH-1	6.17878e+06	80
1744	SURF	Raw	6.87078e+06	100
1745	SURF	Physical	4.88338e+06	100
1746	SURF	ZnCl	6.23604e+06	100
1747	SURF	H3PO4-0.25	1.27929e+06	100
1748	SURF	H3PO4-0.5	4.50187e+06	100
1749	SURF	NaOH-1	7.99015e+06	100
1750	KAZE	Raw	1.47022e+07	20
1751	KAZE	Physical	1.1504e+07	20
1752	KAZE	ZnCl	1.17033e+07	20
1753	KAZE	H3PO4-0.25	8.02389e+06	20
1754	KAZE	H3PO4-0.5	1.33008e+07	20
1755	KAZE	NaOH-1	1.35083e+07	20
1756	KAZE	Raw	3.00708e+06	40
1757	KAZE	Physical	6.76879e+06	40
1758	KAZE	ZnCl	1.32496e+07	40
1759	KAZE	H3PO4-0.25	3.61175e+06	40
1760	KAZE	H3PO4-0.5	5.73275e+06	40
1761	KAZE	NaOH-1	8.1925e+06	40
1762	KAZE	Raw	5.21279e+06	60
1763	KAZE	Physical	5.41398e+06	60
1764	KAZE	ZnCl	1.17601e+07	60
1765	KAZE	H3PO4-0.25	3.23415e+06	60
1766	KAZE	H3PO4-0.5	4.56221e+06	60
1767	KAZE	NaOH-1	7.5119e+06	60
1768	KAZE	Raw	3.95126e+06	80
1769	KAZE	Physical	4.90437e+06	80
1770	KAZE	ZnCl	6.62641e+06	80
1771	KAZE	H3PO4-0.25	3.63998e+06	80
1772	KAZE	H3PO4-0.5	5.18611e+06	80
1773	KAZE	NaOH-1	5.08779e+06	80
1774	KAZE	Raw	2.94513e+06	100
1775	KAZE	Physical	4.30242e+06	100
1776	KAZE	ZnCl	9.57101e+06	100
1777	KAZE	H3PO4-0.25	2.76677e+06	100
1778	KAZE	H3PO4-0.5	4.00866e+06	100
1779	KAZE	NaOH-1	5.4957e+06	100
1780	ME	Raw	4.47459e+07	20
1781	ME	Physical	1.13008e+07	20
1782	ME	ZnCl	1.72092e+07	20
1783	ME	H3PO4-0.25	3.12743e+06	20
1784	ME	H3PO4-0.5	1.02321e+07	20
1785	ME	NaOH-1	9.18683e+06	20
1786	ME	Raw	4.12477e+07	40
1787	ME	Physical	1.46288e+07	40
1788	ME	ZnCl	6.50138e+06	40
1789	ME	H3PO4-0.25	2.96596e+06	40
1790	ME	H3PO4-0.5	3.07044e+06	40
1791	ME	NaOH-1	4.0226e+06	40
1792	ME	Raw	6.74292e+06	60
1793	ME	Physical	1.9222e+07	60
1794	ME	ZnCl	1.05711e+07	60
1795	ME	H3PO4-0.25	5.99849e+06	60
1796	ME	H3PO4-0.5	4.16098e+06	60
1797	ME	NaOH-1	1.24922e+07	60
1798	ME	Raw	2.23101e+07	80
1799	ME	Physical	6.94518e+06	80
1800	ME	ZnCl	9.04993e+06	80
1801	ME	H3PO4-0.25	4.5842e+06	80
1802	ME	H3PO4-0.5	3.3913e+06	80
1803	ME	NaOH-1	5.23453e+06	80
1804	ME	Raw	4.49389e+06	100
1805	ME	Physical	2.22606e+07	100
1806	ME	ZnCl	9.09462e+06	100
1807	ME	H3PO4-0.25	4.17277e+06	100
1808	ME	H3PO4-0.5	2.59371e+06	100
1809	ME	NaOH-1	1.48619e+07	100
1810	Harris	Raw	4.19132e+07	20
1811	Harris	Physical	9.47119e+06	20
1812	Harris	ZnCl	2.14942e+07	20
1813	Harris	H3PO4-0.25	4.70542e+06	20
1814	Harris	H3PO4-0.5	4.76815e+06	20
1815	Harris	NaOH-1	1.81286e+07	20
1816	Harris	Raw	6.61472e+06	40
1817	Harris	Physical	5.65645e+06	40
1818	Harris	ZnCl	1.18747e+07	40
1819	Harris	H3PO4-0.25	2.49952e+06	40
1820	Harris	H3PO4-0.5	3.77115e+06	40
1821	Harris	NaOH-1	5.84899e+06	40
1822	Harris	Raw	5.49743e+06	60
1823	Harris	Physical	5.8296e+06	60
1824	Harris	ZnCl	1.41171e+07	60
1825	Harris	H3PO4-0.25	9.08939e+06	60
1826	Harris	H3PO4-0.5	5.04328e+06	60
1827	Harris	NaOH-1	1.31661e+07	60
1828	Harris	Raw	5.95365e+06	80
1829	Harris	Physical	5.67575e+06	80
1830	Harris	ZnCl	1.15611e+07	80
1831	Harris	H3PO4-0.25	5.18252e+06	80
1832	Harris	H3PO4-0.5	2.85237e+06	80
1833	Harris	NaOH-1	4.96479e+06	80
1834	Harris	Raw	5.47766e+06	100
1835	Harris	Physical	4.81265e+06	100
1836	Harris	ZnCl	1.13444e+07	100
1837	Harris	H3PO4-0.25	3.12272e+06	100
1838	Harris	H3PO4-0.5	3.15534e+06	100
1839	Harris	NaOH-1	1.64364e+07	100
1841	BRISK	Physical	1.77994e+07	20
1842	BRISK	ZnCl	2.50143e+07	20
1843	BRISK	H3PO4-0.25	3.59675e+06	20
1844	BRISK	H3PO4-0.5	1.18755e+07	20
1845	BRISK	NaOH-1	1.29735e+07	20
1847	BRISK	Physical	2.70324e+07	40
1848	BRISK	ZnCl	1.72286e+07	40
1849	BRISK	H3PO4-0.25	3.48159e+06	40
1850	BRISK	H3PO4-0.5	1.13468e+07	40
1851	BRISK	NaOH-1	6.89596e+06	40
1852	BRISK	Physical	2.89295e+07	60
1853	BRISK	ZnCl	1.88728e+07	60
1854	BRISK	H3PO4-0.25	7.25092e+06	60
1856	BRISK	NaOH-1	1.05922e+07	60
1857	BRISK	Raw	-6.47987e+06	80
1858	BRISK	Physical	2.98351e+07	80
1859	BRISK	ZnCl	1.44574e+07	80
1860	BRISK	H3PO4-0.25	6.63493e+06	80
1861	BRISK	H3PO4-0.5	6.89546e+06	80
1863	BRISK	Physical	2.80107e+07	100
1864	BRISK	ZnCl	1.22163e+07	100
1865	BRISK	H3PO4-0.25	3.36104e+06	100
1866	BRISK	H3PO4-0.5	4.9431e+06	100
1867	BRISK	NaOH-1	1.76972e+07	100
1868	ORB	Raw	2.00569e+07	20
1869	ORB	Physical	3.15135e+07	20
1871	ORB	H3PO4-0.25	2.06554e+07	20
1872	ORB	H3PO4-0.5	4.43416e+07	20
1874	ORB	Raw	1.1957e+07	40
1875	ORB	Physical	2.56925e+07	40
1877	ORB	H3PO4-0.25	1.45143e+07	40
1878	ORB	H3PO4-0.5	2.5371e+07	40
1879	ORB	NaOH-1	1.22108e+07	40
1885	ORB	NaOH-1	3.03503e+07	60
1887	ORB	Physical	1.57992e+07	80
1888	ORB	ZnCl	2.40162e+07	80
1890	ORB	H3PO4-0.5	1.74257e+07	80
1893	ORB	Physical	1.2358e+07	100
1894	ORB	ZnCl	1.99559e+07	100
1897	ORB	NaOH-1	3.05683e+07	100
1898	SURF	Raw	1.7932e+07	20
1899	SURF	Physical	9.37988e+06	20
1900	SURF	ZnCl	1.24907e+07	20
1901	SURF	H3PO4-0.25	1.90038e+06	20
1902	SURF	H3PO4-0.5	8.45965e+06	20
1903	SURF	NaOH-1	1.07825e+07	20
1904	SURF	Raw	1.20487e+07	40
1905	SURF	Physical	1.04901e+07	40
1906	SURF	ZnCl	6.72481e+06	40
1907	SURF	H3PO4-0.25	1.15272e+06	40
1908	SURF	H3PO4-0.5	5.75451e+06	40
1909	SURF	NaOH-1	3.89316e+06	40
1910	SURF	Raw	2.74321e+07	60
1911	SURF	Physical	4.59766e+06	60
1912	SURF	ZnCl	8.92128e+06	60
1913	SURF	H3PO4-0.25	1.55233e+06	60
1914	SURF	H3PO4-0.5	3.82057e+06	60
1915	SURF	NaOH-1	9.65394e+06	60
1916	SURF	Raw	1.61607e+07	80
1917	SURF	Physical	6.82853e+06	80
1918	SURF	ZnCl	8.11293e+06	80
1919	SURF	H3PO4-0.25	2.84922e+06	80
1920	SURF	H3PO4-0.5	3.94595e+06	80
1921	SURF	NaOH-1	6.4071e+06	80
1922	SURF	Raw	7.43416e+06	100
1923	SURF	Physical	4.25468e+06	100
1924	SURF	ZnCl	5.20242e+06	100
1925	SURF	H3PO4-0.25	1.49881e+06	100
1926	SURF	H3PO4-0.5	5.14625e+06	100
1927	SURF	NaOH-1	1.23911e+07	100
1928	KAZE	Raw	1.94729e+07	20
1929	KAZE	Physical	7.95833e+06	20
1930	KAZE	ZnCl	7.89997e+06	20
1931	KAZE	H3PO4-0.25	5.01655e+06	20
1932	KAZE	H3PO4-0.5	1.43615e+07	20
1933	KAZE	NaOH-1	1.5348e+07	20
1934	KAZE	Raw	5.22098e+06	40
1935	KAZE	Physical	7.48045e+06	40
1936	KAZE	ZnCl	9.91145e+06	40
1937	KAZE	H3PO4-0.25	3.63618e+06	40
1938	KAZE	H3PO4-0.5	5.93187e+06	40
1939	KAZE	NaOH-1	5.54435e+06	40
1940	KAZE	Raw	3.92732e+06	60
1941	KAZE	Physical	7.54391e+06	60
1942	KAZE	ZnCl	8.33165e+06	60
1943	KAZE	H3PO4-0.25	3.26058e+06	60
1944	KAZE	H3PO4-0.5	4.31341e+06	60
1945	KAZE	NaOH-1	8.89712e+06	60
1946	KAZE	Raw	5.46286e+06	80
1947	KAZE	Physical	6.03035e+06	80
1948	KAZE	ZnCl	9.54417e+06	80
1949	KAZE	H3PO4-0.25	3.15599e+06	80
1950	KAZE	H3PO4-0.5	4.92079e+06	80
1951	KAZE	NaOH-1	4.24206e+06	80
1952	KAZE	Raw	3.4924e+06	100
1953	KAZE	Physical	5.37891e+06	100
1954	KAZE	ZnCl	7.38535e+06	100
1955	KAZE	H3PO4-0.25	1.99628e+06	100
1956	KAZE	H3PO4-0.5	3.42099e+06	100
1957	KAZE	NaOH-1	1.08968e+07	100
1958	ME	Raw	4.29348e+07	20
1959	ME	Physical	3.39686e+06	20
1960	ME	ZnCl	1.37931e+07	20
1961	ME	H3PO4-0.25	3.76951e+06	20
1962	ME	H3PO4-0.5	4.64106e+06	20
1963	ME	NaOH-1	5.44127e+06	20
1964	ME	Raw	4.57166e+06	40
1965	ME	Physical	1.91546e+07	40
1966	ME	ZnCl	8.46686e+06	40
1967	ME	H3PO4-0.25	1.40246e+07	40
1968	ME	H3PO4-0.5	2.21467e+06	40
1969	ME	NaOH-1	3.23196e+06	40
1970	ME	Raw	4.69314e+06	60
1971	ME	Physical	1.54388e+07	60
1972	ME	ZnCl	1.26285e+07	60
1973	ME	H3PO4-0.25	1.20028e+07	60
1974	ME	H3PO4-0.5	4.51799e+06	60
1975	ME	NaOH-1	7.29033e+06	60
1976	ME	Raw	2.31222e+07	80
1977	ME	Physical	5.38547e+06	80
1978	ME	ZnCl	9.85439e+06	80
1979	ME	H3PO4-0.25	1.0257e+07	80
1980	ME	H3PO4-0.5	1.13739e+07	80
1981	ME	NaOH-1	9.06811e+06	80
1982	ME	Raw	1.49738e+07	100
1983	ME	Physical	1.33622e+07	100
1984	ME	ZnCl	8.40077e+06	100
1985	ME	H3PO4-0.25	4.84167e+06	100
1986	ME	H3PO4-0.5	3.96168e+06	100
1987	ME	NaOH-1	4.97482e+06	100
1988	Harris	Raw	3.23158e+07	20
1989	Harris	Physical	1.52253e+06	20
1990	Harris	ZnCl	1.72163e+07	20
1991	Harris	H3PO4-0.25	5.99426e+06	20
1992	Harris	H3PO4-0.5	6.44195e+06	20
1993	Harris	NaOH-1	1.27739e+07	20
1994	Harris	Raw	3.57734e+06	40
1995	Harris	Physical	6.88699e+06	40
1996	Harris	ZnCl	1.29071e+07	40
1997	Harris	H3PO4-0.25	1.35118e+07	40
1998	Harris	H3PO4-0.5	4.24139e+06	40
1999	Harris	NaOH-1	6.29243e+06	40
2000	Harris	Raw	3.94617e+06	60
2001	Harris	Physical	6.11851e+06	60
2002	Harris	ZnCl	1.44639e+07	60
2003	Harris	H3PO4-0.25	4.9966e+06	60
2004	Harris	H3PO4-0.5	4.12503e+06	60
2005	Harris	NaOH-1	7.20603e+06	60
2006	Harris	Raw	5.6425e+06	80
2007	Harris	Physical	4.9469e+06	80
2008	Harris	ZnCl	1.22876e+07	80
2009	Harris	H3PO4-0.25	9.48666e+06	80
2010	Harris	H3PO4-0.5	3.82314e+06	80
2011	Harris	NaOH-1	9.00008e+06	80
2012	Harris	Raw	4.67645e+06	100
2013	Harris	Physical	4.26572e+06	100
2014	Harris	ZnCl	8.79303e+06	100
2015	Harris	H3PO4-0.25	6.57921e+06	100
2016	Harris	H3PO4-0.5	3.59601e+06	100
2017	Harris	NaOH-1	4.89429e+06	100
2018	BRISK	Physical	3.20467e+07	20
2019	BRISK	ZnCl	2.48257e+07	20
2020	BRISK	H3PO4-0.25	6.80255e+06	20
2021	BRISK	H3PO4-0.5	1.56608e+07	20
2022	BRISK	NaOH-1	1.05451e+07	20
2024	BRISK	Physical	3.07883e+07	40
2025	BRISK	ZnCl	1.56038e+07	40
2026	BRISK	H3PO4-0.25	9.44769e+06	40
2027	BRISK	H3PO4-0.5	1.22042e+07	40
2028	BRISK	NaOH-1	8.45973e+06	40
2029	BRISK	Raw	-6.47987e+06	60
2030	BRISK	Physical	3.74556e+07	60
2031	BRISK	ZnCl	1.60165e+07	60
2032	BRISK	H3PO4-0.25	1.23694e+07	60
2033	BRISK	H3PO4-0.5	7.48727e+06	60
2034	BRISK	NaOH-1	1.0371e+07	60
2036	BRISK	Physical	2.73432e+07	80
2037	BRISK	ZnCl	1.34576e+07	80
2038	BRISK	H3PO4-0.25	4.00719e+06	80
2039	BRISK	H3PO4-0.5	6.33644e+06	80
2040	BRISK	NaOH-1	1.02905e+07	80
2041	BRISK	Physical	3.0631e+07	100
2043	BRISK	H3PO4-0.25	1.03655e+06	100
2044	BRISK	H3PO4-0.5	2.74961e+06	100
2045	BRISK	NaOH-1	1.4844e+07	100
2047	ORB	Physical	2.7884e+07	20
2049	ORB	H3PO4-0.25	2.22189e+07	20
2050	ORB	H3PO4-0.5	3.04366e+07	20
2054	ORB	ZnCl	2.83735e+07	40
2055	ORB	H3PO4-0.25	1.19746e+07	40
2056	ORB	H3PO4-0.5	2.63263e+07	40
2057	ORB	NaOH-1	2.64305e+07	40
2063	ORB	NaOH-1	2.00957e+07	60
2064	ORB	Raw	5.35194e+06	80
2066	ORB	ZnCl	1.81784e+07	80
2068	ORB	H3PO4-0.5	1.21166e+07	80
2072	ORB	ZnCl	1.8293e+07	100
2073	ORB	H3PO4-0.25	7.15132e+06	100
2075	ORB	NaOH-1	1.3576e+07	100
2076	SURF	Raw	9.53403e+06	20
2077	SURF	Physical	1.18465e+07	20
2078	SURF	ZnCl	1.17386e+07	20
2079	SURF	H3PO4-0.25	4.01251e+06	20
2080	SURF	H3PO4-0.5	1.34805e+07	20
2081	SURF	NaOH-1	7.07127e+06	20
2082	SURF	Raw	1.10678e+07	40
2083	SURF	Physical	7.46104e+06	40
2084	SURF	ZnCl	1.02213e+07	40
2085	SURF	H3PO4-0.25	1.76638e+06	40
2086	SURF	H3PO4-0.5	7.20385e+06	40
2087	SURF	NaOH-1	3.68326e+06	40
2088	SURF	Raw	8.02737e+06	60
2089	SURF	Physical	6.00491e+06	60
2090	SURF	ZnCl	1.25986e+07	60
2091	SURF	H3PO4-0.25	1.75073e+06	60
2092	SURF	H3PO4-0.5	4.17404e+06	60
2093	SURF	NaOH-1	6.72537e+06	60
2094	SURF	Raw	4.35131e+06	80
2095	SURF	Physical	5.61038e+06	80
2096	SURF	ZnCl	6.60882e+06	80
2097	SURF	H3PO4-0.25	2.26334e+06	80
2098	SURF	H3PO4-0.5	5.13036e+06	80
2099	SURF	NaOH-1	9.37325e+06	80
2100	SURF	Raw	9.9881e+06	100
2101	SURF	Physical	4.7107e+06	100
2102	SURF	ZnCl	4.3921e+06	100
2103	SURF	H3PO4-0.25	2.23228e+06	100
2104	SURF	H3PO4-0.5	4.8334e+06	100
2105	SURF	NaOH-1	7.32837e+06	100
2106	KAZE	Raw	2.69004e+07	20
2107	KAZE	Physical	7.30927e+06	20
2108	KAZE	ZnCl	1.12258e+07	20
2109	KAZE	H3PO4-0.25	2.54747e+06	20
2110	KAZE	H3PO4-0.5	1.24476e+07	20
2111	KAZE	NaOH-1	1.3732e+07	20
2112	KAZE	Raw	5.37662e+06	40
2113	KAZE	Physical	7.16556e+06	40
2114	KAZE	ZnCl	7.97385e+06	40
2115	KAZE	H3PO4-0.25	4.41573e+06	40
2116	KAZE	H3PO4-0.5	5.0566e+06	40
2117	KAZE	NaOH-1	9.09773e+06	40
2118	KAZE	Raw	4.56424e+06	60
2119	KAZE	Physical	6.38497e+06	60
2120	KAZE	ZnCl	1.2069e+07	60
2121	KAZE	H3PO4-0.25	4.19888e+06	60
2122	KAZE	H3PO4-0.5	3.51541e+06	60
2123	KAZE	NaOH-1	7.68194e+06	60
2124	KAZE	Raw	1.63102e+06	80
2125	KAZE	Physical	5.07999e+06	80
2126	KAZE	ZnCl	6.63206e+06	80
2127	KAZE	H3PO4-0.25	3.32186e+06	80
2128	KAZE	H3PO4-0.5	5.20323e+06	80
2129	KAZE	NaOH-1	6.83407e+06	80
2130	KAZE	Raw	3.36327e+06	100
2131	KAZE	Physical	3.88604e+06	100
2132	KAZE	ZnCl	7.95768e+06	100
2133	KAZE	H3PO4-0.25	3.57006e+06	100
2134	KAZE	H3PO4-0.5	3.61182e+06	100
2135	KAZE	NaOH-1	6.13619e+06	100
2136	ME	Raw	2.46521e+07	20
2137	ME	Physical	5.65759e+06	20
2138	ME	ZnCl	8.18318e+06	20
2139	ME	H3PO4-0.25	5.61092e+06	20
2140	ME	H3PO4-0.5	6.16701e+06	20
2141	ME	NaOH-1	1.02618e+07	20
2142	ME	Raw	2.68938e+07	40
2143	ME	Physical	3.39546e+07	40
2144	ME	ZnCl	1.20238e+07	40
2145	ME	H3PO4-0.25	2.04218e+07	40
2146	ME	H3PO4-0.5	6.27097e+06	40
2147	ME	NaOH-1	1.5642e+07	40
2148	ME	Raw	2.80312e+07	60
2149	ME	Physical	2.74024e+07	60
2150	ME	ZnCl	1.13132e+07	60
2151	ME	H3PO4-0.25	8.44097e+06	60
2152	ME	H3PO4-0.5	8.39117e+06	60
2153	ME	NaOH-1	3.52763e+06	60
2154	ME	Raw	1.90096e+07	80
2155	ME	Physical	8.90303e+06	80
2156	ME	ZnCl	8.71854e+06	80
2157	ME	H3PO4-0.25	4.43096e+06	80
2158	ME	H3PO4-0.5	3.14833e+06	80
2159	ME	NaOH-1	7.05585e+06	80
2160	ME	Raw	4.00459e+06	100
2161	ME	Physical	1.81843e+07	100
2162	ME	ZnCl	7.17966e+06	100
2163	ME	H3PO4-0.25	4.30007e+06	100
2164	ME	H3PO4-0.5	7.51564e+06	100
2165	ME	NaOH-1	7.1132e+06	100
2166	Harris	Raw	1.80456e+07	20
2167	Harris	Physical	2.11376e+06	20
2168	Harris	ZnCl	2.03939e+07	20
2169	Harris	H3PO4-0.25	1.04186e+07	20
2170	Harris	H3PO4-0.5	8.94827e+06	20
2171	Harris	NaOH-1	1.73081e+07	20
2172	Harris	Raw	1.16686e+07	40
2173	Harris	Physical	5.13671e+06	40
2174	Harris	ZnCl	1.5427e+07	40
2175	Harris	H3PO4-0.25	1.53098e+07	40
2176	Harris	H3PO4-0.5	2.52584e+06	40
2177	Harris	NaOH-1	1.70838e+07	40
2178	Harris	Raw	9.07558e+06	60
2179	Harris	Physical	4.27354e+06	60
2180	Harris	ZnCl	1.51972e+07	60
2181	Harris	H3PO4-0.25	8.8122e+06	60
2182	Harris	H3PO4-0.5	5.47281e+06	60
2183	Harris	NaOH-1	3.53835e+06	60
2184	Harris	Raw	4.1501e+06	80
2185	Harris	Physical	5.5749e+06	80
2186	Harris	ZnCl	1.21846e+07	80
2187	Harris	H3PO4-0.25	7.29369e+06	80
2188	Harris	H3PO4-0.5	3.10457e+06	80
2189	Harris	NaOH-1	6.59304e+06	80
2190	Harris	Raw	4.83147e+06	100
2191	Harris	Physical	6.87611e+06	100
2192	Harris	ZnCl	1.10712e+07	100
2193	Harris	H3PO4-0.25	5.9738e+06	100
2194	Harris	H3PO4-0.5	3.43885e+06	100
2195	Harris	NaOH-1	5.64776e+06	100
2196	BRISK	Physical	2.97298e+07	20
2197	BRISK	ZnCl	2.76855e+07	20
2198	BRISK	H3PO4-0.25	3.1145e+06	20
2199	BRISK	H3PO4-0.5	2.63581e+07	20
2200	BRISK	NaOH-1	1.49505e+07	20
2202	BRISK	Physical	3.1747e+07	40
[truncated: 14,097 more rows]
